# Supplementary material for: Effect of involving certified healthcare assistants in primary care in Germany: a cross-sectional study
Source: PubMed Central journal article supplement — BMJ Open. 2019 Dec 29;9(12):e033325. doi: 10.1136/bmjopen-2019-033325 (PMC6936982; doi:10.1136/bmjopen-2019-033325), 2019-12-29
Supplement: bmjopen-2019-033325.draft_revisions.pdf [file bmjopen-2019-033325.draft_revisions.pdf]

# BMJ Open

BMJ Open is committed to open peer review. As part of this commitment we make the peer review history of every article we publish publicly available.

When an article is published we post the peer reviewers' comments and the authors' responses online. We also post the versions of the paper that were used during peer review. These are the versions that the peer review comments apply to.

The versions of the paper that follow are the versions that were submitted during the peer review process. They are not the versions of record or the final published versions. They should not be cited or distributed as the published version of this manuscript.

BMJ Open is an open access journal and the full, final, typeset and author-corrected version of record of the manuscript is available on our site with no access controls, subscription charges or pay-per-view fees (<http://bmjopen.bmj.com>).

If you have any questions on BMJ Open's open peer review process please email [info.bmjopen@bmj.com](mailto:info.bmjopen@bmj.com)

# BMJ Open

## Effect of involving highly qualified non-physician health care professionals in primary care: A cross-sectional study on quality and efficacy in 861.223 patients in Germany

|                               |                                                                                                                                                                                                                                                                                                                                                                                                                                                                                                                                                                |
|-------------------------------|----------------------------------------------------------------------------------------------------------------------------------------------------------------------------------------------------------------------------------------------------------------------------------------------------------------------------------------------------------------------------------------------------------------------------------------------------------------------------------------------------------------------------------------------------------------|
| Journal:                      | <i>BMJ Open</i>                                                                                                                                                                                                                                                                                                                                                                                                                                                                                                                                                |
| Manuscript ID                 | bmjopen-2019-033325                                                                                                                                                                                                                                                                                                                                                                                                                                                                                                                                            |
| Article Type:                 | Research                                                                                                                                                                                                                                                                                                                                                                                                                                                                                                                                                       |
| Date Submitted by the Author: | 08-Aug-2019                                                                                                                                                                                                                                                                                                                                                                                                                                                                                                                                                    |
| Complete List of Authors:     | Senft, Jonas; University Hospital Heidelberg, Department of General Practice and Health Services Research;<br>Wensing , M; University Hospital Heidelberg, Department of General Practice and Health Services Research<br>Poss-Doering, Regina; University Hospital Heidelberg, Department of General Practice and Health Services Research<br>Szecsenyi, Joachim; University Hospital Heidelberg, Department of General Practice and Health Services Research<br>Laux, Gunter; UniversitatsKlinikum Heidelberg, General Practice and Health Services Research |
| Keywords:                     | GENERAL MEDICINE (see Internal Medicine), HEALTH SERVICES ADMINISTRATION & MANAGEMENT, HEALTH ECONOMICS                                                                                                                                                                                                                                                                                                                                                                                                                                                        |
|                               |                                                                                                                                                                                                                                                                                                                                                                                                                                                                                                                                                                |

SCHOLARONE™  
Manuscripts

1  
2  
3 **1 Effect of involving highly qualified non-physician health care**  
4 **2 professionals in primary care: A cross-sectional study on**  
5 **3 quality and efficacy in 861.223 patients in Germany**  
6  
7  
8  
9

10 Short title: Effect of highly qualified non-physician health care professionals in  
11 primary care  
12  
13  
14

15 6 Jonas D. Senft<sup>1</sup>, Michel Wensing<sup>1</sup>, Regina Poss-Doering<sup>1</sup>, Joachim Szecsenyi<sup>1</sup>,  
16  
17  
18 7 Gunter Laux<sup>1</sup>  
19  
20  
21  
22

23 9 <sup>1</sup>Department of General Practice and Health Services Research, University  
24 Hospital Heidelberg, Im Neuenheimer Feld 130.3, 69120 Heidelberg, Germany  
25  
26  
27  
28  
29

30 12 Funding: This study was funded by institutional means of the University of  
31 Heidelberg.  
32  
33  
34  
35

36 15 Corresponding author information:

37 16 Jonas D. Senft, MD

38 17 Department of General Practice and Health Services Research

39 18 University Hospital Heidelberg

40 19 Im Neuenheimer Feld 130.3

41 20 69120 Heidelberg, Germany

42 21 Tel+49(0)6221-56-4743

43 22 Fax +49 (0)6221-56-1972

44 23 E-mail: [jonas.senft@med.uni-heidelberg.de](mailto:jonas.senft@med.uni-heidelberg.de)  
45  
46  
47  
48  
49  
50  
51  
52  
53  
54  
55  
56  
57  
58  
59  
60

1  
2  
3 **1 Abstract**  
4

5 **2 Objectives:** Growing prevalence of chronic diseases and limited resources  
6  
7 are key challenges for future health care. As a promising approach to  
8  
9 maintain access to high-quality primary care, non-physician health care  
10  
11 professionals have been trained to broaden qualifications and responsibilities.  
12  
13 However, to date it is unclear whether this development is targeted to meet  
14  
15  
16  
17 future challenges.  
18

19 **8 Design:** Cross-sectional study

20  
21 **9 Setting:** Primary care  
22

23  
24 **10 Participants:** Patients insured by the AOK statutory health insurer (Baden-  
25  
26  
27  
28 Wuerttemberg, Germany).  
29

30  
31 **12 Interventions:** Since 2008 practice assistants in Germany can enhance their  
32  
33 professional education to become certified health care assistants (HCA,  
34  
35 German: VERAH).  
36

37  
38 **15 Primary and secondary outcome measures:** Claims data related to patients  
39  
40 treated in practices employing at least one certified HCA were compared to  
41  
42 data from practices not employing HCAs (non-HCA) to determine frequency of  
43  
44 consultations, hospital admissions and readmissions. Economic analysis  
45  
46 comprised number of uneconomic prescriptions and costs for hospitalization  
47  
48 and outpatient medication.  
49

50  
51 **21 Results:** A total of 397.493 patients were treated in HCA practices, 463.730  
52  
53 patients attended to non-HCA practices. Patients in HCA practices had an 8.2%  
54  
55 lower rate of specialist consultations ( $p < 0.0001$ ), a 4.0% lower rate of  
56  
57 hospitalizations ( $p < 0.0001$ ), a 3.5% lower rate of readmissions ( $p = 0.0463$ ), a  
58  
59 14.2% lower rate of uneconomic prescriptions and 4.7% lower costs of total  
60

1 medication ( $p < 0.0001$ ). No difference was found regarding the consultation rate  
2 of general practitioners and hospital costs.

3 **Conclusions:** For the first time this high-volume data analysis showed that  
4 involving higher qualified non-physician health care professionals in primary  
5 care is associated with a reduction in hospital admissions, specialist  
6 consultations and overall medication costs. Consequently, broadening  
7 qualifications may be a successful strategy not only to share physicians' work  
8 load but to improve quality and efficacy in primary care to meet future  
9 challenges. Further studies should explore specific tasks to be shared with non-  
10 physician workforces and standardization of the professional role.

## 1 **Strengths and limitations of this study**

- 2 • This is the first high-volume data analysis assessing the potential effect of  
3 broadening qualifications and responsibilities of non-physician health care  
4 professionals on quality and efficacy of primary care.
- 5 • It was possible to show that involving health care assistants (HCAs) in  
6 primary care in Germany is associated with a reduced rate in hospital  
7 admissions, specialist consultations and overall medication costs.
- 8 • The study indicates that broadening of qualifications of non-physician  
9 health care professionals could be of high relevance for the development  
10 of primary care concepts to meet future health care challenges.
- 11 • The professional role of HCAs in Germany is not fully standardized, thus  
12 limitations are given to the transferability of the intervention.
- 13 • Due to the retrospective study design, potential bias and confounding  
14 factors cannot be fully excluded, however, adjustments for known  
15 confounders were performed for the analysis.

1  
2  
3 **1 Abbreviations:**  
4

5  
6 2 AOK statutory health insurance provider (German: Allgemeine  
7  
8 3 Ortskrankenkasse)  
9  
10 4 GP general practitioner  
11  
12 5 HCA health care assistant  
13  
14 6 HZV GP-centred care (German: Hausarztzentrierte Versorgung)  
15  
16 7 PZN central pharmaceutical number (Pharmazentralnummer)  
17  
18  
19  
20  
21  
22  
23  
24  
25  
26  
27  
28  
29  
30  
31  
32  
33  
34  
35  
36  
37  
38  
39  
40  
41  
42  
43  
44  
45  
46  
47  
48  
49  
50  
51  
52  
53  
54  
55  
56  
57  
58  
59  
60

For peer review only

## 1 Introduction

2 All over the globe, providing access to high-quality primary care is a challenge  
3 for health care systems. In the view of growing prevalence of chronic diseases  
4 and limited health care resources, physicians are confronted with increasing  
5 numbers of consultations while time is very limited.

6 Particularly in times of evidence-based practice and growing use of treatment  
7 algorithms, time is needed to meet patient's individual preferences or  
8 circumstances, which are deciding factors for treatment success [1,2].

9 Consequently, strategies are needed to maintain access to high-quality  
10 general practice. As a promising worldwide approach, highly qualified non-  
11 physician health care professionals such as nurse practitioners and practice  
12 nurses in the U.S. or in Australia, or primary healthcare nurse practitioners in  
13 Canada, are trained to take a more active role in primary care, particularly in  
14 treatment of patients with chronic diseases [3–6]. In Germany non-physician  
15 staff in primary care usually consists of practice assistants, who absolved  
16 professional training for three years. Since 2008 practical assistants in may  
17 undergo an additional training program of 200 hours to become certified as a  
18 so-called health care assistant (in German: "Versorgungsassistent/in in der  
19 Hausarztpraxis", VERAH). Health care assistants (HCAs) are qualified to be  
20 closer involved in primary care delivery performing tasks such as team-based  
21 case management and monitoring of chronically-ill patients, routine home  
22 visits, and wound care [5].

23 However, to date there is only limited knowledge about the effect of  
24 broadening skills and responsibilities of non-physician workforces on quality  
25 and efficacy of primary care. Recent RCTs did not find a beneficial effect of



1  
2  
3 1 disease management programs led by non-physician work forces on care  
4  
5 2 indicators like hospitalization rate or health care costs [7–9]. A recent  
6  
7 3 Cochrane meta-analysis of 18 RCTs assessing the influence of nurses  
8  
9 4 working as a substitute for physicians showed that nurse-led care may be  
10  
11 5 equal in terms of health outcomes like control of diabetes and blood pressure  
12  
13 6 and patient satisfaction [10]. However, no conclusion could be drawn with  
14  
15 7 regard to the influence of involving nurses or other highly-qualified non-  
16  
17 8 physician health care professionals on efficacy indicators like hospitalization  
18  
19 9 rate, specialist consultations and costs. Furthermore, sample size planning of  
20  
21 10 available RCTs was not adjusted for these indicators and may be  
22  
23 11 underpowered to capture effects in this regard. For the first time this  
24  
25 12 retrospective data analysis was intended to assess the influence of  
26  
27 13 broadening skills and responsibilities of non-physician health care  
28  
29 14 professionals in a high-volume setting.  
30  
31  
32  
33  
34  
35  
36  
37  
38  
39  
40  
41  
42  
43  
44  
45  
46  
47  
48  
49  
50  
51  
52  
53  
54  
55  
56  
57  
58  
59  
60

## 1 **Methods**

### 2 Study Design

3 A comparative observational study was conducted. Data related to patients  
4 treated in general practices between January 1 and December 31, 2014 were  
5 supplied by the AOK statutory health insurance company (AOK Baden-  
6 Wuerttemberg, Germany) and used to assess the influence of involving  
7 trained practice assistants in primary care delivery. The local institutional  
8 Ethics Committee of the University Hospital Heidelberg had no concerns to  
9 use these data without informed consent for study purposes (No. S-  
10 359/2013).

### 11 Study population

12 Secondary data related to patients insured by the AOK statutory health  
13 insurance company of Baden-Wuerttemberg, Germany, and participating in a  
14 specific primary care program in Germany (GP-centred care; German:  
15 "Hausarztzentrierte Versorgung" (HZV)) were eligible for data analysis. The  
16 federal state of Baden-Wuerttemberg has a population of about 10.7 million  
17 and AOK is the largest statutory health insurer with about 4 million insured  
18 persons. The HZV program is a large-scale legally stipulated care concept  
19 encouraging patients to enroll with a general practitioner (GP), aiming to  
20 strengthen primary care and to enhance health care for patients with chronic  
21 diseases and complex health care needs [11]. Secondary patient data were  
22 included in the analysis, if patients met the following criteria: aged 18 years or  
23 older, living in Baden-Wuerttemberg, at least one visit to the primary care  
24 physician in the relevant year, no registration with other primary care

1  
2  
3 1 contracts (e.g., integrated care contracts), no interruptions of registration to  
4  
5 2 HZV program in the relevant year.

### 3 Intervention

4 Since 2008, practice assistants working in practices participating in the HZV  
5 program in Germany, can enhance their professional education by attending a  
6 standardized curriculum of 200 teaching units of theoretical and practical  
7 lessons. Upon examination, these practice assistants become certified as  
8 HCA (German: VERAH) [5]. Besides routine tasks like blood sampling, ECGs  
9 or spirometries, HCAs are thought to perform monitoring of chronically-ill  
10 patients, prevention measures, routine home visits and wound care  
11 management.

### 12 Data acquisition and outcome parameters

13 Secondary patient data were recorded by the AOK state health insurance  
14 company for reimbursement purposes and continuous evaluation of the HZV  
15 program. For the analysis, data were supplied by the AOK to the Department  
16 of General Practice and Health Services Research, University Hospital  
17 Heidelberg. Subjects cannot be identified, directly or through identifiers linked  
18 to the subjects. Data storage and extraction were performed with MySQL  
19 Community Server x64 (Oracle Corporation, Redwood Shores, CA, USA). All  
20 national and institutional guidelines concerning data acquisition for  
21 retrospective analyses were followed at all times.

22 The obtained data set comprised age, gender, diagnoses according to ICD-10  
23 coding as well as accounting data on consultations, prescribed medication and  
24 hospital stays. The Charlson index was determined according to ICD-10  
25 documentation in order to approximate patients' overall morbidity. Diagnoses

1 of chronic conditions were assigned to values between 1 and 6 according to  
2 severity. Finally, a sum score was determined for each patient. The underlying  
3 calculus is described in detail elsewhere [12]. The number of patient contacts  
4 to GP could be determined by the codes according to the EBM system  
5 (“Einheitlicher Bewertungsmaßstab”) used for accounting of outpatient medical  
6 services in Germany. Outpatient medication costs in € and the number of  
7 prescription so-called me-too drugs, patent-secured marginally altered  
8 pharmaceuticals with no benefit compared to the prototype drug according to  
9 evidence-based criteria [13], was be determined using records of the central  
10 pharmaceutical numbers of prescribed medications (“Pharmazentralnummer”,  
11 PZN). Number of hospital admissions, readmissions within 4 weeks and costs  
12 for hospitalization in € was determined by the recorded Diagnosis Related  
13 Groups (DRG) codes used for reimbursement of inpatient medical services in  
14 Germany.

#### 15 Statistical analysis

16 In order to calculate frequencies, rates and percentages, we used SAS PROC  
17 SQL. In order to assess the adjusted outcomes of interest, we used SAS  
18 PROC GENMOD (SAS V.9.4×64, SAS Institute). The following factors were  
19 selected ex ante for the adjustment of the comparison between groups:  
20 patient age, sex, Charlson index [12], nursing home as residence, nursing  
21 care level (legally defined 4-point scale to assess need for nursing support),  
22 urbanization (rural, urban), practice size (number of contacts in relevant  
23 period), type of practice (single, group). For all analyses, results were  
24 considered statistically significant, if the p value was 0.05 or less.

25

1  
2  
3 1 Patient and public involvement  
4  
5 2 Exploring strategies to provide and maintain access to high-quality primary  
6  
7 3 care is of public interest, particularly in the view of growing prevalence of  
8  
9 4 chronic diseases and limited health care resources. Due to the retrospective  
10  
11 5 study design based on an analysis of pseudonymized data, patients could not  
12  
13 6 be identified, nor be informed or involved into this study. The public  
14  
15 7 dissemination of the results is intended to be achieved by scientific  
16  
17 8 publication.  
18  
19  
20  
21  
22  
23  
24  
25  
26  
27  
28  
29  
30  
31  
32  
33  
34  
35  
36  
37  
38  
39  
40  
41  
42  
43  
44  
45  
46  
47  
48  
49  
50  
51  
52  
53  
54  
55  
56  
57  
58  
59  
60

## 1 Results

2 861.223 patients were evaluated in the observation period from January 1 to  
 3 December 31, 2014. 397.493 patients were treated in practices involving at  
 4 least one HCA to primary care (HCA group), 463.730 patients were seen in  
 5 practices, which did not employ HCAs (non-HCA group). Patients  
 6 characteristics are shown in Table 1.

Table 1: Patient characteristics

|                    | HCA            | Non-HCA        | p       |
|--------------------|----------------|----------------|---------|
| Number of patients | 397493         | 463730         |         |
| Male (N, %)        | 174415 (43.9%) | 200775 (43.2%) | <0.0001 |
| Age                | 56.9 ± 18.5    | 58.4 ± 18.1    | <0.0001 |
| Charlson Index     | 1.37 ± 2.0     | 1.38 ± 1.98    | <0.0001 |
| Care level [N]     |                |                | <0.0001 |
| No care:           | 378919         | 442024         |         |
| I:                 | 11186          | 13165          |         |
| II:                | 5771           | 6765           |         |
| III:               | 1593           | 1751           |         |
| IV:                | 24             | 25             |         |

Continuous values are presented as mean ± standard deviation; HCA: health care assistant;

7  
 8 According to the adjusted analysis patients in the HCA-group had an 8.2%  
 9 lower rate of specialist consultations ( $p < 0.0001$ ). Per-patient number of  
 10 hospitalizations was 4.0% lower ( $p < 0.0001$ ) and number of readmissions was  
 11 3.5% lower in the HCA group ( $p = 0.0463$ ). Prescriptions of non-generic  
 12 medication were 14.2% lower and total medication costs for outpatient care was  
 13 4.69% lower in the HCA-group respectively ( $p < 0.0001$ ). No difference was  
 14 found with regarding the number of GP consultations and costs of  
 15 hospitalization (Table 2).

16 Table 2: Outcomes

| Parameter                       | Unadjusted Outcome |               | Adjusted Difference (AD) HCA vs. non-HCA |         |         |
|---------------------------------|--------------------|---------------|------------------------------------------|---------|---------|
|                                 | HCA                | Non-HCA       | AD [95%CI]                               | AD in % | p       |
| GP consultations                | 13.46 ± 11.42      | 13.72 ± 11.81 | -0.063 ± 0.021 [-0.105, -0.022]          | -0.21%  | 0.0028  |
| Specialist consultations        | 4.59 ± 8.23        | 4.89 ± 8.38   | -0.209 ± 0.018 [-0.245, 0.173]           | -8.21%  | <0.0001 |
| Hospitalization                 | 0.272 ± 0.762      | 0.286 ± 0.790 | -0.013 ± 0.008 [-0.057, -0.025]          | -4.00%  | <0.0001 |
| Readmissions                    | 0.210 ± 0.682      | 0.216 ± 0.721 | -0.036 ± 0.018 [-0.071, -0.006]          | -3.53%  | 0.0463  |
| Costs of hospitalization [€]    | 6,239 ± 9,388      | 6319 ± 9278   | -40.42 ± 0.005 [-0.018, 0.003]           | 0.73%   | 0.1711  |
| Avoidable prescriptions         | 3.12 ± 10.15       | 3.57 ± 10.89  | -0.388 ± 0.026 [-0.437, -0.334]          | -14.2%  | <0.0001 |
| Outpatient medication costs [€] | 1,333 ± 59,877     | 1376 ± 51567  | -71.01 ± 0.011 [-0.070, -0.026]          | 4.69%   | <0.0001 |

Values are presented as mean ± standard deviation; AD: adjusted difference; GP: general practitioner;

HCA: health care assistant; CI: confidence interval

## 1 Discussion

2 For the first time, this retrospective data analysis assessed the influence of  
3 enhancing qualifications and responsibilities of non-physician health care  
4 professionals on quality and efficacy of primary care in a high volume setting.  
5 The analysis of care-related data of 861.223 patients showed a lower rate of  
6 hospitalizations, specialist consultations as well as lower overall medication  
7 costs when HCAs were part of the practice staff. Although the measured  
8 effect is low-scaled, it is of high relevance for the development of future  
9 primary care concepts. From a patient-centered view avoiding hospitalization  
10 or unnecessary medication may help to reduce patients' burden and morbidity  
11 due to hospital stay or pharmacological side-effects. On the other hand,  
12 avoidable treatment will be not only a central determinant of quality, but a key  
13 cost factor for health care systems, which will be challenged by the rising  
14 prevalence of chronic diseases in the future.

15 The measured effect may be hypothesized to be due to an improved patient  
16 access to primary care. Either directly by attending to higher qualified practice  
17 assistants or indirectly by improvement of workflow, patients may benefit from  
18 a higher quality and efficacy of care. Hospitalizations and specialist  
19 consultations may be avoided by a more intensive outpatient care.  
20 Particularly, patients with chronic diseases may benefit from extended  
21 services like intense monitoring, education and reminders. And eventually,  
22 costs for prescriptions may be reduced by efficient management of medication  
23 regimen.

24 To date, knowledge about potential effects of involving higher qualified non-  
25 physician healthcare professionals in primary care is low. Several RCTs



1  
2  
3 1 evaluating disease management programs for chronic conditions like chronic  
4  
5 2 pulmonary disease or heart failure involved such practice assistants, however,  
6  
7 3 did not prove an effect on relevant care indicators [4,8,14]. A potential reason  
8  
9 4 for this contrast to our findings may be an underpowered sample-size  
10  
11 5 postulating a reduction of avoidable hospitalizations up to 20%. For  
12  
13 6 comparison, a recent meta-analysis of 12 RCTs evaluating complex  
14  
15 7 multidisciplinary disease management programs involving medical care by  
16  
17 8 specialist physicians for heart failure patients found a considerably lower  
18  
19 9 scaled effect size, showing a reduction of 8% in all-cause hospitalization,  
20  
21 10 which is closer to the effect measured in this present study [15].  
22  
23  
24 11 Another relevant finding of this study is that the rate of GP consultations was  
25  
26 12 only slightly reduced by 0.21% when HCAs were involved. This is noteworthy,  
27  
28 13 since one may expect that HCAs may perform chosen routine tasks  
29  
30 14 independently. On the other hand, this result may reflect that involvement of  
31  
32 15 HCAs is not implemented as a one-way delegation or as a substitution for  
33  
34 16 physician care like it has been proposed for nurse-led care concepts [10], but  
35  
36 17 more as a team interaction possibly generating a more efficient and high-  
37  
38 18 quality work flow. However, the specific influence of involving HCAs is difficult  
39  
40 19 to determine, since in Germany there is no firmly standardized professional  
41  
42 20 role. A recent survey showed that tasks performed by HCAs differ widely  
43  
44 21 from simple patient assessment or basic wound care to tasks with substantial  
45  
46 22 responsibility like emergency home visits, chronic care management or  
47  
48 23 treatment of complex wounds [5]. Eventually, the GP decides which tasks are  
49  
50 24 performed by HCAs and how far they perform them independently. While this  
51  
52 25 approach meets individual eligibility, more standardization may be favorable  
53  
54  
55  
56  
57  
58  
59  
60

1  
2  
3 1 to identify tasks to be shared in team according to their effect on care quality  
4  
5 2 and efficacy. Furthermore it could help to reveal potential limitations, like e.g.  
6  
7 3 it has been found in nurse-led self-management programs of COPD, which  
8  
9 4 have been associated with higher airway-related mortality [8,16]. A promising  
10  
11 5 approach for a standardized involvement of HCAs certainly lies in chronic  
12  
13 6 disease management programs, which proved to be efficient for heart failure  
14  
15 7 or asthma bronchiale [15,17,18]. New IT-based methods such as web-based  
16  
17 8 telemedical care, which has been shown to prevent hospital admissions and  
18  
19 9 reduce all-cause mortality in heart failure patients, should also be considered  
20  
21  
22 10 [19]. Finally, standardized translational approaches after hospital release are  
23  
24 11 promising to reduce hospitalization rates and improve quality of life, like it has  
25  
26 12 been shown in COPD patients recently [20].  
27  
28  
29 13 To our knowledge this high-volume secondary data analysis is the first study  
30  
31 14 indicating that involvement of highly qualified non-physician health care  
32  
33 15 professionals to primary care has a beneficial effect the rate of hospital  
34  
35 16 admissions, specialist consultations and overall medication costs. Limitations  
36  
37 17 are given by the retrospective study design and associated risk of bias.  
38  
39 18 However, potential confounding factors such as patients' morbidity and type  
40  
41 19 and size of included practices were considered for the adjustment of the  
42  
43 20 intervention effect. Another limitation may be given by the transferability, since  
44  
45 21 the role of HCAs is not firmly standardized and therefore no recommendations  
46  
47 22 can be given regarding the specific tasks, which may be performed by higher  
48  
49 23 qualified medical workforces. Furthermore, evaluation of relevant patient-  
50  
51 24 related outcome parameters such as quality of life was not possible in this  
52  
53 25 analysis. These aspects may be addressed by further prospective studies.  
54  
55  
56  
57  
58  
59  
60

1  
2  
3 1 As a conclusion, this high-volume retrospective data analysis showed that  
4  
5 2 involving highly qualified non-physician health care professionals in primary  
6  
7 3 care is associated with a reduction in hospital admissions, specialist  
8  
9 4 consultations and overall medication costs. Consequently, this may be a  
10  
11 5 successful strategy not only to share physicians' work load but to improve  
12  
13 6 quality and efficacy of primary care to meet future health care challenges.  
14  
15 7 Further studies should explore specific tasks to be shared with non-physician  
16  
17 8 workforces and standardization of the professional role.  
18  
19  
20  
21  
22  
23  
24  
25  
26  
27  
28  
29  
30  
31  
32  
33  
34  
35  
36  
37  
38  
39  
40  
41  
42  
43  
44  
45  
46  
47  
48  
49  
50  
51  
52  
53  
54  
55  
56  
57  
58  
59  
60

## **Acknowledgements**

1 We would like to thank the statutory health insurance provider AOK Baden-  
2 Wuerttemberg (Germany) for providing pseudonymized data for this analysis.

## **Contributors**

3 Jonas D. Senft: design and methods, writing the article; Regina Poss-Doering:  
4 revision of the article; Michel Wensing: revision of the article; Joachim  
5 Szecsenyi: design and methods, revision of the article; Gunter Laux: design  
6 and methods, statistical analysis, revision of the article. All authors commented  
7 on the draft and approved the final version of the manuscript.

## **Competing interests**

8 The authors Jonas D. Senft, Regina Poss-Doering, Michel Wensing, Joachim  
9 Szecsenyi and Gunter Laux have no conflict of interest or financial ties to  
10 disclose. Data was supplied by the statutory health insurance AOK Baden-  
11 Wuerttemberg, which had no role in analysis, interpretation, or publication of  
12 the data.

## **Funding**

13 The authors have not declared a specific grant for this research from any  
14 funding agency in the public, commercial or not-for-profit sectors.

## **Data sharing statement**

15 Data used in this analysis are not in the public domain and use is covered by  
16 data sharing agreements with the AOK Baden-Wuerttemberg.

**References:**

1. Zolnierek KBH, Dimatteo MR. Physician communication and patient adherence to treatment: a meta-analysis. *Med Care*. 2009;47: 826–834. doi:10.1097/MLR.0b013e31819a5acc
2. Kelley JM, Kraft-Todd G, Schapira L, Kossowsky J, Riess H. The influence of the patient-clinician relationship on healthcare outcomes: a systematic review and meta-analysis of randomized controlled trials. *PLoS ONE*. 2014;9: e94207. doi:10.1371/journal.pone.0094207
3. Ghorob A, Bodenheimer T. Sharing the care to improve access to primary care. *N Engl J Med*. 2012;366: 1955–1957. doi:10.1056/NEJMp1202775
4. Freund T, Peters-Klimm F, Boyd CM, Mahler C, Gensichen J, Erler A, et al. Medical Assistant-Based Care Management for High-Risk Patients in Small Primary Care Practices: A Cluster Randomized Clinical Trial. *Ann Intern Med*. 2016;164: 323–330. doi:10.7326/M14-2403
5. Mergenthal K, Beyer M, Gerlach FM, Guethlin C. Sharing Responsibilities within the General Practice Team - A Cross-Sectional Study of Task Delegation in Germany. *PLoS ONE*. 2016;11: e0157248. doi:10.1371/journal.pone.0157248
6. Freund T, Everett C, Griffiths P, Hudon C, Naccarella L, Laurant M. Skill mix, roles and remuneration in the primary care workforce: who are the healthcare professionals in the primary care teams across the world? *Int J Nurs Stud*. 2015;52: 727–743. doi:10.1016/j.ijnurstu.2014.11.014
7. Bekelman DB, Plomondon ME, Carey EP, Sullivan MD, Nelson KM, Hattler B, et al. Primary Results of the Patient-Centered Disease Management (PCDM) for Heart Failure Study: A Randomized Clinical Trial. *JAMA Intern Med*. 2015;175: 725–732. doi:10.1001/jamainternmed.2015.0315
8. Fan VS, Gaziano JM, Lew R, Bourbeau J, Adams SG, Leatherman S, et al. A comprehensive care management program to prevent chronic obstructive pulmonary disease hospitalizations: a randomized, controlled trial. *Ann Intern Med*. 2012;156: 673–683. doi:10.7326/0003-4819-156-10-201205150-00003
9. Connor KI, Cheng EM, Barry F, Siebens HC, Lee ML, Ganz DA, et al. Randomized trial of care management to improve Parkinson disease care quality. *Neurology*. 2019;92: e1831–e1842. doi:10.1212/WNL.0000000000007324
10. Laurant M, van der Biezen M, Wijers N, Watananirun K, Kontopantelis E, van Vught AJ. Nurses as substitutes for doctors in primary care. *Cochrane Database Syst Rev*. 2018;7: CD001271. doi:10.1002/14651858.CD001271.pub3

- 1  
2  
3 1 11. Laux G, Kaufmann-Kolle P, Bauer E, Goetz K, Stock C, Szecsenyi J.  
4 2 [Evaluation of family doctor centred medical care based on AOK routine  
5 3 data in Baden-Württemberg]. *Z Evid Fortbild Qual Gesundheitswes.*  
6 4 2013;107: 372–378. doi:10.1016/j.zefq.2013.07.001  
7  
8  
9 5 12. Sundararajan V, Henderson T, Perry C, Muggivan A, Quan H, Ghali WA.  
10 6 New ICD-10 version of the Charlson comorbidity index predicted in-  
11 7 hospital mortality. *J Clin Epidemiol.* 2004;57: 1288–1294.  
12 8 doi:10.1016/j.jclinepi.2004.03.012  
13  
14 9 13. Fricke U, Hein L, Schwabe U. *Neue Arzneimittel 2016*. In: Schwabe U,  
15 10 Paffrath D, Ludwig W-D, Klauber J, editors. *Arzneiverordnungs-Report*  
16 11 2017. Berlin, Heidelberg: Springer Berlin Heidelberg; 2017. pp. 55–135.  
17 12 doi:10.1007/978-3-662-54630-7\_3  
18  
19  
20 13 14. Siebenhofer A, Ulrich L-R, Mergenthal K, Berghold A, Pregartner G,  
21 14 Kemperdick B, et al. Primary care management for patients receiving  
22 15 long-term antithrombotic treatment: A cluster-randomized controlled trial.  
23 16 *PLoS ONE.* 2019;14: e0209366. doi:10.1371/journal.pone.0209366  
24  
25 17 15. Takeda A, Martin N, Taylor RS, Taylor SJ. Disease management  
26 18 interventions for heart failure. *Cochrane Database Syst Rev.* 2019;1:  
27 19 CD002752. doi:10.1002/14651858.CD002752.pub4  
28  
29  
30 20 16. Lenferink A, Brusse-Keizer M, van der Valk PD, Frith PA, Zwerink M,  
31 21 Monninkhof EM, et al. Self-management interventions including action  
32 22 plans for exacerbations versus usual care in patients with chronic  
33 23 obstructive pulmonary disease. *Cochrane Database Syst Rev.* 2017;8:  
34 24 CD011682. doi:10.1002/14651858.CD011682.pub2  
35  
36  
37 25 17. Smith SM, Soubhi H, Fortin M, Hudon C, O'Dowd T. Interventions for  
38 26 improving outcomes in patients with multimorbidity in primary care and  
39 27 community settings. *Cochrane Database Syst Rev.* 2012; CD006560.  
40 28 doi:10.1002/14651858.CD006560.pub2  
41  
42  
43 29 18. Peytremann-Bridevaux I, Arditi C, Gex G, Bridevaux P-O, Burnand B.  
44 30 Chronic disease management programmes for adults with asthma.  
45 31 *Cochrane Database Syst Rev.* 2015; CD007988.  
46 32 doi:10.1002/14651858.CD007988.pub2  
47  
48 33 19. Koehler F, Koehler K, Deckwart O, Prescher S, Wegscheider K, Kirwan B-  
49 34 A, et al. Efficacy of telemedical interventional management in patients with  
50 35 heart failure (TIM-HF2): a randomised, controlled, parallel-group,  
51 36 unmasked trial. *Lancet.* 2018;392: 1047–1057. doi:10.1016/S0140-  
52 37 6736(18)31880-4  
53  
54  
55 38 20. Aboumatar H, Naqibuddin M, Chung S, Chaudhry H, Kim SW, Saunders  
56 39 J, et al. Effect of a Program Combining Transitional Care and Long-term  
57 40 Self-management Support on Outcomes of Hospitalized Patients With

1  
2  
3  
4  
5  
6  
7  
8  
9  
10  
11  
12  
13  
14  
15  
16  
17  
18  
19  
20  
21  
22  
23  
24  
25  
26  
27  
28  
29  
30  
31  
32  
33  
34  
35  
36  
37  
38  
39  
40  
41  
42  
43  
44  
45  
46  
47  
48  
49  
50  
51  
52  
53  
54  
55  
56  
57  
58  
59  
60

1 Chronic Obstructive Pulmonary Disease: A Randomized Clinical Trial.  
2 JAMA. 2018;320: 2335–2343. doi:10.1001/jama.2018.17933

3

4

For peer review only

**STROBE 2007 (v4) Statement—Checklist of items that should be included in reports of *cross-sectional studies***

| Section/Topic                | Item # | Recommendation                                                                                                                                                                       | Reported on page # |
|------------------------------|--------|--------------------------------------------------------------------------------------------------------------------------------------------------------------------------------------|--------------------|
| <b>Title and abstract</b>    | 1      | (a) Indicate the study's design with a commonly used term in the title or the abstract                                                                                               | 1                  |
|                              |        | (b) Provide in the abstract an informative and balanced summary of what was done and what was found                                                                                  | 2                  |
| <b>Introduction</b>          |        |                                                                                                                                                                                      |                    |
| Background/rationale         | 2      | Explain the scientific background and rationale for the investigation being reported                                                                                                 | 6                  |
| Objectives                   | 3      | State specific objectives, including any prespecified hypotheses                                                                                                                     | 6                  |
| <b>Methods</b>               |        |                                                                                                                                                                                      |                    |
| Study design                 | 4      | Present key elements of study design early in the paper                                                                                                                              | 8                  |
| Setting                      | 5      | Describe the setting, locations, and relevant dates, including periods of recruitment, exposure, follow-up, and data collection                                                      | 9                  |
| Participants                 | 6      | (a) Give the eligibility criteria, and the sources and methods of selection of participants                                                                                          | 8                  |
| Variables                    | 7      | Clearly define all outcomes, exposures, predictors, potential confounders, and effect modifiers. Give diagnostic criteria, if applicable                                             | 9                  |
| Data sources/<br>measurement | 8*     | For each variable of interest, give sources of data and details of methods of assessment (measurement). Describe comparability of assessment methods if there is more than one group | 9                  |
| Bias                         | 9      | Describe any efforts to address potential sources of bias                                                                                                                            | 10                 |
| Study size                   | 10     | Explain how the study size was arrived at                                                                                                                                            | 10                 |
| Quantitative variables       | 11     | Explain how quantitative variables were handled in the analyses. If applicable, describe which groupings were chosen and why                                                         | 10                 |
| Statistical methods          | 12     | (a) Describe all statistical methods, including those used to control for confounding                                                                                                | 10                 |
|                              |        | (b) Describe any methods used to examine subgroups and interactions                                                                                                                  | 10                 |
|                              |        | (c) Explain how missing data were addressed                                                                                                                                          | n/a                |
|                              |        | (d) If applicable, describe analytical methods taking account of sampling strategy                                                                                                   | n/a                |
|                              |        | (e) Describe any sensitivity analyses                                                                                                                                                | 10                 |
| <b>Results</b>               |        |                                                                                                                                                                                      |                    |



|                          |     |                                                                                                                                                                                                              |     |
|--------------------------|-----|--------------------------------------------------------------------------------------------------------------------------------------------------------------------------------------------------------------|-----|
| Participants             | 13* | (a) Report numbers of individuals at each stage of study—eg numbers potentially eligible, examined for eligibility, confirmed eligible, included in the study, completing follow-up, and analysed            | 11  |
|                          |     | (b) Give reasons for non-participation at each stage                                                                                                                                                         | n/a |
|                          |     | (c) Consider use of a flow diagram                                                                                                                                                                           | n/a |
| Descriptive data         | 14* | (a) Give characteristics of study participants (eg demographic, clinical, social) and information on exposures and potential confounders                                                                     | 11  |
|                          |     | (b) Indicate number of participants with missing data for each variable of interest                                                                                                                          | n/a |
| Outcome data             | 15* | Report numbers of outcome events or summary measures                                                                                                                                                         | 12  |
| Main results             | 16  | (a) Give unadjusted estimates and, if applicable, confounder-adjusted estimates and their precision (eg, 95% confidence interval). Make clear which confounders were adjusted for and why they were included | 12  |
|                          |     | (b) Report category boundaries when continuous variables were categorized                                                                                                                                    | n/a |
|                          |     | (c) If relevant, consider translating estimates of relative risk into absolute risk for a meaningful time period                                                                                             | n/a |
| Other analyses           | 17  | Report other analyses done—eg analyses of subgroups and interactions, and sensitivity analyses                                                                                                               | 12  |
| <b>Discussion</b>        |     |                                                                                                                                                                                                              |     |
| Key results              | 18  | Summarise key results with reference to study objectives                                                                                                                                                     | 13  |
| Limitations              | 19  | Discuss limitations of the study, taking into account sources of potential bias or imprecision. Discuss both direction and magnitude of any potential bias                                                   | 15  |
| Interpretation           | 20  | Give a cautious overall interpretation of results considering objectives, limitations, multiplicity of analyses, results from similar studies, and other relevant evidence                                   | 16  |
| Generalisability         | 21  | Discuss the generalisability (external validity) of the study results                                                                                                                                        | 15  |
| <b>Other information</b> |     |                                                                                                                                                                                                              |     |
| Funding                  | 22  | Give the source of funding and the role of the funders for the present study and, if applicable, for the original study on which the present article is based                                                | 17  |

\*Give information separately for cases and controls in case-control studies and, if applicable, for exposed and unexposed groups in cohort and cross-sectional studies.

**Note:** An Explanation and Elaboration article discusses each checklist item and gives methodological background and published examples of transparent reporting. The STROBE checklist is best used in conjunction with this article (freely available on the Web sites of PLoS Medicine at <http://www.plosmedicine.org/>, Annals of Internal Medicine at <http://www.annals.org/>, and Epidemiology at <http://www.epidem.com/>). Information on the STROBE Initiative is available at [www.strobe-statement.org](http://www.strobe-statement.org).

# BMJ Open

## Effect of involving certified health care assistants in primary care in Germany: A cross-sectional study on quality and effectiveness in 861,223 patients

|                                 |                                                                                                                                                                                                                                                                                                                                                                                                                                                                                                                                                                |
|---------------------------------|----------------------------------------------------------------------------------------------------------------------------------------------------------------------------------------------------------------------------------------------------------------------------------------------------------------------------------------------------------------------------------------------------------------------------------------------------------------------------------------------------------------------------------------------------------------|
| Journal:                        | <i>BMJ Open</i>                                                                                                                                                                                                                                                                                                                                                                                                                                                                                                                                                |
| Manuscript ID                   | bmjopen-2019-033325.R1                                                                                                                                                                                                                                                                                                                                                                                                                                                                                                                                         |
| Article Type:                   | Original research                                                                                                                                                                                                                                                                                                                                                                                                                                                                                                                                              |
| Date Submitted by the Author:   | 24-Oct-2019                                                                                                                                                                                                                                                                                                                                                                                                                                                                                                                                                    |
| Complete List of Authors:       | Senft, Jonas; University Hospital Heidelberg, Department of General Practice and Health Services Research;<br>Wensing , M; University Hospital Heidelberg, Department of General Practice and Health Services Research<br>Poss-Doering, Regina; University Hospital Heidelberg, Department of General Practice and Health Services Research<br>Szecsenyi, Joachim; University Hospital Heidelberg, Department of General Practice and Health Services Research<br>Laux, Gunter; UniversitatsKlinikum Heidelberg, General Practice and Health Services Research |
| <b>Primary Subject Heading</b>: | Geriatric medicine                                                                                                                                                                                                                                                                                                                                                                                                                                                                                                                                             |
| Secondary Subject Heading:      | Health services research, Medical education and training, General practice / Family practice                                                                                                                                                                                                                                                                                                                                                                                                                                                                   |
| Keywords:                       | GENERAL MEDICINE (see Internal Medicine), HEALTH SERVICES ADMINISTRATION & MANAGEMENT, HEALTH ECONOMICS                                                                                                                                                                                                                                                                                                                                                                                                                                                        |
|                                 |                                                                                                                                                                                                                                                                                                                                                                                                                                                                                                                                                                |

SCHOLARONE™  
Manuscripts

1  
2  
3 **1 Effect of involving certified health care assistants in primary**  
4 **2 care in Germany: A cross-sectional study on quality and**  
5 **3 effectiveness in 861,223 patients**  
6  
7  
8  
9

10 Short title: Effect of involving certified health care assistants in primary care in  
11  
12 Germany  
13

14  
15 6 Jonas D. Senft<sup>1</sup>, Michel Wensing<sup>1</sup>, Regina Poss-Doering<sup>1</sup>, Joachim Szecsenyi<sup>1</sup>,  
16  
17 Gunter Laux<sup>1</sup>  
18  
19

20 8  
21  
22 9 <sup>1</sup>Department of General Practice and Health Services Research, University  
23  
24 Hospital Heidelberg, Im Neuenheimer Feld 130.3, 69120 Heidelberg, Germany  
25  
26

27 11  
28  
29 12 Funding: This study was funded by institutional means of the University of  
30  
31 Heidelberg.  
32  
33

34 14  
35  
36 15 Corresponding author information:

37 16 Jonas D. Senft, MD

38 17 Department of General Practice and Health Services Research

39 18 University Hospital Heidelberg

40 19 Im Neuenheimer Feld 130.3

41 20 69120 Heidelberg, Germany

42 21 Tel+49(0)6221-56-4743

43 22 Fax +49 (0)6221-56-1972

44 23 E-mail: [jonas.senft@med.uni-heidelberg.de](mailto:jonas.senft@med.uni-heidelberg.de)  
45  
46  
47  
48  
49  
50  
51  
52  
53  
54  
55  
56  
57  
58  
59  
60

1  
2  
3 **1 Abstract**  
4

5 **2 Objectives:** Growing prevalence of chronic diseases and limited resources are  
6  
7 key challenges for future health care. As a promising approach to maintain  
8  
9 access to high-quality primary care, non-physician health care professionals  
10  
11 have been trained to broaden qualifications and responsibilities. However, to  
12  
13 date it is unclear whether this development is targeted to meet future  
14  
15 challenges.  
16  
17

18  
19 **8 Design:** Cross-sectional study  
20

21  
22 **9 Setting:** Primary care  
23

24 **10 Participants:** Patients insured by the AOK statutory health insurer (Allgemeine  
25  
26 Ortskrankenkasse, Baden-Wuerttemberg, Germany).  
27

28 **12 Interventions:** Since 2008 practice assistants in Germany can enhance their  
29  
30 professional education to become certified health care assistants (HCA,  
31  
32 German: VERAH).  
33  
34

35 **15 Primary and secondary outcome measures:** Claims data related to patients  
36  
37 treated in practices employing at least one HCA were compared to data from  
38  
39 practices not employing HCAs (non-HCA) to determine frequency of  
40  
41 consultations, hospital admissions and readmissions. Economic analysis  
42  
43 comprised hospitalization costs, prescriptions of follow-on drugs and outpatient  
44  
45 medication costs.  
46  
47

48  
49 **21 Results:** A total of 397,493 patients were treated in HCA practices, 463,730  
50  
51 patients attended to non-HCA practices. Patients in HCA practices had an 8.2%  
52  
53 lower rate of specialist consultations ( $p<0.0001$ ), a 4.0% lower rate of  
54  
55 hospitalizations ( $p<0.0001$ ), a 3.5% lower rate of readmissions ( $p=0.0463$ ), a  
56  
57 14.2% lower rate of follow-on drug prescriptions ( $p<0.0001$ ) and 4.7% lower  
58  
59  
60

1 costs of total medication ( $p < 0.0001$ ). No difference was found regarding the  
2 consultation rate of general practitioners and hospital costs.

3 **Conclusions:** For the first time this high-volume data analysis showed that  
4 involving higher qualified non-physician health care professionals in primary  
5 care is associated with a reduction in hospital admissions, specialist  
6 consultations and overall medication costs. Consequently, broadening  
7 qualifications may be a successful strategy not only to share physicians' work  
8 load but to improve quality and efficacy in primary care to meet future  
9 challenges. Further studies should explore specific tasks to be shared with non-  
10 physician workforces and standardization of the professional role.

## 1 **Strengths and limitations of this study**

- 2 • This is the first high-volume data analysis assessing the effect of broadening  
3 qualifications of non-physician workforces on quality and efficacy health  
4 care indicators.
- 5 • The analysis is performed on a comprehensive sample of data of one year  
6 covering 861,223 patients.
- 7 • Statistical adjustment was possible for relevant patient-sided factors like  
8 patients' age and morbidity, nursing care level and structural factors like  
9 practice size, urbanization and type (single or group practice).
- 10 • Due to the limitations given by the nature of claims data further potentially  
11 relevant factors like educational level and experience of the staff were not  
12 available for this analysis.
- 13 • The professional role of HCAs in Germany is not standardized, thus  
14 limitations are given to the transferability of the intervention.

1  
2  
3 **1 Abbreviations:**  
4

5  
6 2 AOK statutory health insurance provider (German: Allgemeine  
7  
8 3 Ortskrankenkasse)  
9  
10 4 GP general practitioner  
11  
12 5 HCA health care assistant  
13  
14 6 HZV GP-centred care (German: Hausarztzentrierte Versorgung)  
15  
16 7 PZN central pharmaceutical number (Pharmazentralnummer)  
17  
18  
19  
20  
21  
22  
23  
24  
25  
26  
27  
28  
29  
30  
31  
32  
33  
34  
35  
36  
37  
38  
39  
40  
41  
42  
43  
44  
45  
46  
47  
48  
49  
50  
51  
52  
53  
54  
55  
56  
57  
58  
59  
60

For peer review only

## 1 Introduction

2 All over the globe, providing access to high-quality primary care is a challenge  
3 for health care systems. In the view of growing prevalence of chronic diseases  
4 and limited health care resources, physicians are confronted with increasing  
5 numbers of consultations while time is very limited [1,2].

6 Particularly in times of evidence-based practice and growing use of treatment  
7 algorithms, time is needed to meet patient's individual preferences or  
8 circumstances, which are deciding factors for treatment success [3,4].

9 Consequently, strategies are needed to maintain access to high-quality general  
10 practice. As a promising worldwide approach, highly qualified non-physician  
11 health care professionals such as practice nurses in the U.S. or in Australia are  
12 trained to take a more active role in primary care, particularly in treatment of  
13 patients with chronic diseases [5–8]. For primary healthcare registered nurses  
14 or nurse practitioners in Canada, there is growing evidence that their  
15 involvement in practices is associated with health promotion, particularly in the  
16 management of chronic diseases [9–11].

17 While qualified nurses are well integrated in primary care in other countries, in  
18 Germany so far there is no professional role for nurses in general medicine. On  
19 the other hand, non-academic workforces like practice or medical assistants  
20 have become increasingly involved into active patient care as they have been  
21 integrated into treatment monitoring or patient coaching for chronic diseases  
22 like diabetes e.g. in the United States [8,12,13]. In Germany, general  
23 practitioners (GP) usually employ certified practice assistants, who absolved  
24 professional training for three years and traditionally performed clerical duties  
25 like reception and routine tasks, such as blood sampling or electrocardiogram



1 recording. Since 2008 practical assistants may undergo an additional training  
2 program of 200 hours to become certified as a so-called health care assistant  
3 (German: "Versorgungsassistent/in in der Hausarztpraxis", VERAH). Health  
4 care assistants (HCAs) are qualified to be closer involved in primary care  
5 delivery performing tasks such as team-based case management and  
6 monitoring of chronically-ill patients, routine home visits, and wound care [7].  
7 However, to date there is only limited knowledge about the effect of broadening  
8 skills and responsibilities of non-physician workforces on quality and efficacy of  
9 primary care. Recent RCTs did not find a beneficial effect of disease  
10 management programs led by non-physician work forces on care indicators like  
11 hospitalization rate or health care costs [14–16]. A recent meta-analysis of 18  
12 RCTs assessing the influence of nurses working as a substitute for physicians  
13 showed that nurse-led care may be equal in terms of health outcomes like  
14 control of diabetes and blood pressure and patient satisfaction [17].  
15 However, no evidence-based conclusion can be drawn currently with regard to  
16 the influence of involving higher qualified non-physician workforce on health  
17 care efficacy indicators like hospitalization rate, specialist consultations and  
18 costs. Furthermore, common sample sizes of available RCTs may be  
19 underpowered to capture effects in this regard. The aim of this study was to  
20 assess the influence of involving certified health care assistants on quality and  
21 efficacy of primary care in Germany. For this purpose, for the first time a high-  
22 volume claims data cross-sectional study was performed.

## 1 **Methods**

### 2 Study Design

3 A cross-sectional study was conducted. Claims data related to patients treated  
4 in general practices between January 1 and December 31, 2014 were supplied  
5 by the AOK statutory health insurance company (German: "Allgemeine  
6 Ortskrankenkasse", Baden-Wuerttemberg, Germany). Data of patients treated  
7 in practices employing at least one certified HCA were compared to data from  
8 practices not employing HCAs (non-HCA) to assess the influence of involving  
9 HCAs in primary care delivery. Ethical approval for this study was given by the  
10 local institutional Ethics Committee of the University Hospital Heidelberg (No.  
11 S-359/2013).

### 12 Study population

13 Secondary data related to patients insured by the AOK statutory health  
14 insurance company of Baden-Wuerttemberg, Germany, and participating in a  
15 specific primary care program in Germany (GP-centred care; German:  
16 "Hausarztzentrierte Versorgung" (HZV)) were eligible for data analysis. The  
17 federal state of Baden-Wuerttemberg has a population of about 10.7 million and  
18 AOK is the largest statutory health insurer with about 4 million insured persons.  
19 The HZV program is a large-scale, legally stipulated care concept encouraging  
20 patients to enroll with a general practitioner (GP), aiming to strengthen primary  
21 care and to enhance health care for patients with chronic diseases and complex  
22 health care needs [18]. Secondary patient data were included in the analysis, if  
23 patients met the following criteria: aged 18 years or older, living in Baden-  
24 Wuerttemberg, at least one visit to the primary care physician in the relevant

1  
2  
3 1 year, no registration with other primary care contracts (e.g., integrated care  
4  
5 2 contracts), no interruptions of registration to HZV program in the relevant year.  
6

### 7 3 Intervention

8  
9 4 Since 2008, practice assistants working in practices participating in the HZV  
10  
11 5 program in Germany, can enhance their professional education by attending a  
12  
13 6 standardized curriculum of 200 teaching units of theoretical and practical  
14  
15 7 lessons. Upon mandatory examination, these practice assistants become state-  
16  
17 8 certified as HCA (German: VERAH) [7]. Besides routine tasks like blood  
18  
19 9 sampling, electrocardiogram recording or spirometry, HCAs are thought to  
20  
21 10 perform monitoring of chronically-ill patients, prevention measures, routine  
22  
23 11 home visits and wound care management.  
24  
25

### 26 12 Data acquisition and outcome parameters

27  
28  
29 13 Secondary patient data were recorded by the AOK state health insurance  
30  
31 14 company for reimbursement purposes and continuous evaluation of the HZV  
32  
33 15 program. For the analysis, data were supplied by the AOK to the Department  
34  
35 16 of General Practice and Health Services Research, University Hospital  
36  
37 17 Heidelberg. Practices employing certified HCAs could be unambiguously  
38  
39 18 identified since employment of HCAs is obligatorily reimbursed by state health  
40  
41 19 insurance in the HZV program. The claims data consisted of several data sets,  
42  
43 20 containing particular information on patient care (e. g. GP consultations,  
44  
45 21 prescriptions and hospitalizations). These data could be linked on the basis of  
46  
47 22 a unique patient identifier. Data linkage was performed by our research team  
48  
49 23 using a relational database. Subjects cannot be identified, directly or through  
50  
51 24 identifiers linked to the subjects. Data storage and extraction were performed  
52  
53 25 with MySQL Community Server x64 (Oracle Corporation, Redwood Shores,  
54  
55  
56  
57  
58  
59  
60

1 CA, USA). All national and institutional guidelines concerning data acquisition  
2 for retrospective analyses were followed at all times.

3 The obtained data set comprised age, gender, diagnoses according to ICD-10  
4 coding as well as accounting data on consultations, prescribed medication and  
5 hospital stays.

6 To assess the effect of involving HCAs on quality and efficacy of primary care,  
7 the following outcome parameters were analyzed: GP consultations, specialist  
8 consultations, hospital admissions, hospital readmissions within 4 weeks,  
9 hospitalization costs, prescription of follow-on drugs and outpatient medication  
10 costs. The number of GP and specialist consultations per patient could be  
11 determined by the codes according to the EBM system (“Einheitlicher  
12 Bewertungsmaßstab”) used for accounting of outpatient medical services in  
13 Germany. Number of hospital admissions and readmissions per patient as well  
14 as per-patient costs for hospitalization in € was determined by the recorded  
15 Diagnosis Related Groups (DRG) codes used for reimbursement of inpatient  
16 medical services in Germany. The per-patient number of prescriptions of so-  
17 called follow-on drugs, patent-secured marginally altered pharmaceuticals with  
18 no benefit compared to the prototype drug according to evidence-based criteria  
19 [19], was determined by records of the central pharmaceutical numbers of  
20 prescribed medications (“Pharmazentralnummer”, PZN). Outpatient medication  
21 costs per patient in € could be determined by accounting data for prescriptions  
22 reimbursed by the AOK state health insurance.

### 23 Statistical analysis

24 The full sample of available claims data was used for the analysis. In order to  
25 calculate frequencies, rates and percentages, we used SAS PROC SQL. In

1  
2  
3 1 order to assess the adjusted outcomes of interest, we used SAS PROC  
4  
5 2 GENMOD (SAS V.9.4×64, SAS Institute). The following factors were selected  
6  
7 3 ex ante for the adjustment of the comparison between groups: patient age, sex,  
8  
9 4 morbidity according to Charlson Index [20], nursing home as residence, nursing  
10  
11 5 care level (legally defined 4-point scale to assess need for nursing support),  
12  
13 6 urbanization (rural, urban), practice size (number of contacts in relevant  
14  
15 7 period), type of practice (single, group). Comparison between groups was done  
16  
17 8 by multivariable regression analysis, which the three-level clustering of  
18  
19 9 patients, GPs and practices into account. Depending on the distribution of each  
20  
21 10 outcome, linear regression, negative-binomial regression or Poisson  
22  
23 11 regression models (for count data) were used. For all analyses, results were  
24  
25 12 considered statistically significant, if the p value was 0.05 or less.

### 30 13 Patient and public involvement

31  
32 14 Exploring strategies to provide and maintain access to high-quality primary care  
33  
34 15 is of public interest, particularly in the view of growing prevalence of chronic  
35  
36 16 diseases and limited health care resources. Due to the retrospective study  
37  
38 17 design based on an analysis of pseudonymized data, patients could not be  
39  
40 18 identified, nor be informed or involved into this study. The public dissemination  
41  
42 19 of the results is intended to be achieved by scientific publication.  
43  
44  
45  
46  
47  
48  
49  
50  
51  
52  
53  
54  
55  
56  
57  
58  
59  
60

## 1 Results

2 861,223 patients were evaluated in the observation period from January 1 to  
3 December 31, 2014. 397.493 patients were treated in practices involving at  
4 least one HCA to primary care (HCA group), 463.730 patients were seen in  
5 practices, which did not employ HCAs (non-HCA group). Patients  
6 characteristics are shown in Table 1.

Table 1: Patient characteristics: Data of patients treated in practices employing  
at least one HCA compared to practices not employing HCAs (non-HCA)

|                    | HCA            | Non-HCA        | p       |
|--------------------|----------------|----------------|---------|
| Number of patients | 397493         | 463730         |         |
| Male (N, %)        | 174415 (43.9%) | 200775 (43.2%) | <0.0001 |
| Age                | 56.9 ± 18.5    | 58.4 ± 18.1    | <0.0001 |
| Charlson Index     | 1.37 ± 2.0     | 1.38 ± 1.98    | <0.0001 |
| Care level [N]     |                |                | <0.0001 |
| No care:           | 378919         | 442024         |         |
| I:                 | 11186          | 13165          |         |
| II:                | 5771           | 6765           |         |
| III:               | 1593           | 1751           |         |
| IV:                | 24             | 25             |         |

Continuous values are presented as mean ± standard deviation; HCA: health care assistant;

7 According to the adjusted analysis patients in the HCA-group had an 8.2%  
8 lower rate of specialist consultations ( $p < 0.0001$ ). Per-patient number of hospital  
9 admissions was 4.0% lower ( $p < 0.0001$ ) and number of hospital readmissions  
10 was 3.5% lower in the HCA group ( $p = 0.0463$ ). Prescriptions of follow-on drugs  
11 were 14.2% lower and total outpatient medication costs were 4.69% lower in  
12 the HCA-group respectively ( $p < 0.0001$ ). No difference was found with  
13 regarding the number of GP consultations and hospitalization costs (Table 2).

Table 2: Outcomes: Outcome parameters for patients treated in practices employing at least one HCA compared to practices not employing HCAs (non-HCA)

| Per-patient outcome             | Unadjusted Outcome |               | Adjusted Difference (AD) HCA vs. non-HCA |         |         |
|---------------------------------|--------------------|---------------|------------------------------------------|---------|---------|
|                                 | HCA                | Non-HCA       | AD [95%CI]                               | AD in % | p       |
| GP consultations                | 13.46 ± 11.42      | 13.72 ± 11.81 | -0.063 ± 0.021 [-0.105, -0.022]          | -0.21%  | 0.0028  |
| Specialist consultations        | 4.59 ± 8.23        | 4.89 ± 8.38   | -0.209 ± 0.018 [-0.245, 0.173]           | -8.21%  | <0.0001 |
| Hospital admissions             | 0.272 ± 0.762      | 0.286 ± 0.790 | -0.013 ± 0.008 [-0.057, -0.025]          | -4.00%  | <0.0001 |
| Hospital readmissions           | 0.210 ± 0.682      | 0.216 ± 0.721 | -0.036 ± 0.018 [-0.071, -0.006]          | -3.53%  | 0.0463  |
| Hospitalization costs [€]       | 6,239 ± 9,388      | 6319 ± 9278   | -40.42 ± 0.005 [-0.018, 0.003]           | 0.73%   | 0.1711  |
| Prescription of follow-on drugs | 3.12 ± 10.15       | 3.57 ± 10.89  | -0.388 ± 0.026 [-0.437, -0.334]          | -14.2%  | <0.0001 |
| Outpatient medication costs [€] | 1,333 ± 59,877     | 1376 ± 51567  | -71.01 ± 0.011 [-0.070, -0.026]          | 4.69%   | <0.0001 |

Values are presented as mean ± standard deviation; AD: adjusted difference; GP: general practitioner;

HCA: health care assistant; CI: confidence interval

## 1 Discussion

2 For the first time, this cross-sectional study assessed high-volume claims data  
3 to evaluate the influence of enhancing qualifications and responsibilities of non-  
4 physician health care professionals on quality and efficacy of primary care. The  
5 analysis of care-related data of 861,223 patients showed a lower rate of hospital  
6 admissions, specialist consultations as well as lower outpatient medication  
7 costs when HCAs were part of the practice staff. Although the measured effect  
8 is low-scaled, it is of high relevance for the development of future primary care  
9 concepts. From a patient-centered view, avoiding hospitalization or  
10 unnecessary medication may help to reduce patients' burden and morbidity due  
11 to hospital stay or pharmacological side-effects. On the other hand, avoidable  
12 treatment will be not only a central determinant of quality, but a key cost factor  
13 for health care systems, which will be challenged by the rising prevalence of  
14 chronic diseases in the future.

15 The measured effect may be hypothesized to be due to an improved patient  
16 access to primary care. Either directly by attending to higher qualified practice  
17 assistants, or indirectly by improvement of workflow, patients may benefit from  
18 a higher quality and efficacy of care. Hospitalizations and specialist  
19 consultations may be avoided by a more intensive outpatient care. Particularly,  
20 patients with chronic diseases may benefit from extended services like intense  
21 monitoring, education and reminders [21]. And eventually, costs for  
22 prescriptions may be reduced by efficient management of medication regimen.  
23 To date, knowledge about potential effects of involving higher qualified non-  
24 physician healthcare professionals in primary care is low. Several RCTs  
25 evaluating disease management programs for chronic conditions like chronic



1  
2  
3 1 pulmonary disease or heart failure involved such practice assistants, however,  
4  
5 2 did not prove an effect on relevant care indicators [6,15,22]. A potential reason  
6  
7 3 for this contrast to our findings may be an underpowered sample-size  
8  
9 4 postulating a reduction of avoidable hospitalizations up to 20%. The results of  
10  
11 5 our study show a much smaller effect with a reduction of 4% hospitalizations  
12  
13 6 when HCAs were involved, which in our opinion is closer to reality in primary  
14  
15 7 care. As a comparison, even in settings of complex disease management  
16  
17 8 programs for heart failure patients performed by highly educated non-physician  
18  
19 9 work force and specialist involvement, low rates of reduction in all-cause  
20  
21 10 hospitalization are common, with a range of up to 8% as a recent meta-analysis  
22  
23 11 of 12 RCTs showed [23].

24  
25  
26  
27  
28 12 Another relevant finding of this study is that the rate of GP consultations was  
29  
30 13 only slightly reduced by 0.21% when HCAs were involved. This is noteworthy,  
31  
32 14 since a distinct reduction of GP consultations might have been expected  
33  
34 15 assuming that HCAs perform chosen routine tasks independently. One the  
35  
36 16 other hand, this result may reflect that involvement of HCAs is not implemented  
37  
38 17 as a one-way delegation or as a substitution for physician care as has been  
39  
40 18 proposed for nurse-led care concepts [17], but more as a team interaction.  
41  
42 19 However, no conclusion can be drawn by this study with regard to the specific  
43  
44 20 role of HCAs within the practice staff. As a recent survey showed, in Germany  
45  
46 21 there is no firmly standardized professional role for HCAs. Performed tasks  
47  
48 22 differ widely from simple patient assessment or basic wound care to tasks with  
49  
50 23 substantial responsibility like emergency home visits, chronic care  
51  
52 24 management or treatment of complex wounds [7]. Eventually, the GP decides  
53  
54 25 which tasks are performed by HCAs and how far they perform them  
55  
56  
57  
58  
59  
60

1 independently. While this approach meets individual eligibility, more  
2 standardization may be favourable to identify tasks to be shared in team  
3 according to their effect on care quality and efficacy. Furthermore, it could help  
4 to reveal potential limitations, as found in nurse-led self-management programs  
5 of COPD, which have been associated with higher airway-related mortality  
6 [15,24]. A promising approach for a standardized involvement of HCAs certainly  
7 lies in chronic disease management programs, which proved to be efficient for  
8 heart failure or asthma bronchiale [23,25,26]. New IT-based methods such as  
9 web-based telemedical care, which has been shown to prevent hospital  
10 admissions and reduce all-cause mortality in heart failure patients, should also  
11 be considered [27]. Finally, standardized translational approaches after hospital  
12 release are promising to reduce readmission rates [28,29].

13 To our knowledge, this high-volume cross-sectional study is the first study  
14 indicating that involvement of highly qualified non-physician health care  
15 professionals to primary care has a beneficial effect on the rate of hospital  
16 admissions, specialist consultations and overall medication costs.

17 Limitations are given by the study design and the associated risk of confounding  
18 factors. Due the nature of claims data, the parameters available for analysis  
19 were limited. Consequently, the evaluation of relevant patient-reported  
20 outcomes such as e.g. quality of life was not possible in this analysis.  
21 Furthermore, the omission of practice details was an important element of the  
22 data protection contract for participating practices with the objective not to be  
23 identifiable by researchers. Potentially relevant structural factors such as  
24 educational level and experience of the staff or structural characteristics of the  
25 practices like equipment or procedural factors such as available diagnostics

1  
2  
3  
4  
5  
6  
7  
8  
9  
10  
11  
12  
13  
14  
15  
16  
17  
18  
19  
20  
21  
22  
23  
24  
25  
26  
27  
28  
29  
30  
31  
32  
33  
34  
35  
36  
37  
38  
39  
40  
41  
42  
43  
44  
45  
46  
47  
48  
49  
50  
51  
52  
53  
54  
55  
56  
57  
58  
59  
60

1 and treatment options, were not available for this analysis. Consequently,  
2 limitations given by the nature of claims data have to be considered. On the  
3 other hand, we deliberately chose claims data for this analysis due to the high  
4 volume and statistical power necessary to assess the chosen outcomes.  
5 Furthermore, in our opinion the available structural factors included in this  
6 analysis represent an appropriate and best possible adjustment for the  
7 measured outcomes.

8 This high-volume cross-sectional study showed that involving highly qualified  
9 non-physician health care professionals in primary care is associated with a  
10 reduction in hospital admissions, specialist consultations and overall  
11 medication costs. Consequently, this may be a successful strategy not only to  
12 alleviate physicians' work load, but to improve quality and efficacy of primary  
13 care to meet future health care challenges. Further studies should explore  
14 specific tasks to be shared with non-physician workforces and standardization  
15 of the professional role.

## Acknowledgements

1 We would like to thank the statutory health insurance provider AOK Baden-  
2 Wuerttemberg (Germany) for providing pseudonymized data for this analysis.

## Contributors

3 Jonas D. Senft: design and methods, writing the article; Regina Poss-Doering:  
4 data interpretation, revision of the article; Michel Wensing: data interpretation,  
5 revision of the article; Joachim Szecsenyi: design and methods, revision of the  
6 article; Gunter Laux: design and methods, statistical analysis, revision of the  
7 article. All authors commented on the draft and approved the final version of  
8 the manuscript.

## Competing interests

9 The authors Jonas D. Senft, Regina Poss-Doering, Michel Wensing, Joachim  
10 Szecsenyi and Gunter Laux have no conflict of interest or financial ties to  
11 disclose. Data was supplied by the statutory health insurance AOK Baden-  
12 Wuerttemberg, which had no role in analysis, interpretation, or publication of  
13 the data.

## Funding

14 The authors have not declared a specific grant for this research from any  
15 funding agency in the public, commercial or not-for-profit sectors.

## Data sharing statement

16 Data used in this analysis are not in the public domain and use is covered by  
17 data sharing agreements with the AOK Baden-Wuerttemberg.

**References:**

1. Wolff JL, Starfield B, Anderson G. Prevalence, expenditures, and complications of multiple chronic conditions in the elderly. *Arch Intern Med.* 2002;162: 2269–2276. doi:10.1001/archinte.162.20.2269
2. Fried TR, Tinetti ME, Iannone L. Primary care clinicians' experiences with treatment decision making for older persons with multiple conditions. *Arch Intern Med.* 2011;171: 75–80. doi:10.1001/archinternmed.2010.318
3. Zolnieriek KBH, Dimatteo MR. Physician communication and patient adherence to treatment: a meta-analysis. *Med Care.* 2009;47: 826–834. doi:10.1097/MLR.0b013e31819a5acc
4. Kelley JM, Kraft-Todd G, Schapira L, Kossowsky J, Riess H. The influence of the patient-clinician relationship on healthcare outcomes: a systematic review and meta-analysis of randomized controlled trials. *PLoS ONE.* 2014;9: e94207. doi:10.1371/journal.pone.0094207
5. Ghorob A, Bodenheimer T. Sharing the care to improve access to primary care. *N Engl J Med.* 2012;366: 1955–1957. doi:10.1056/NEJMp1202775
6. Freund T, Peters-Klimm F, Boyd CM, Mahler C, Gensichen J, Erler A, et al. Medical Assistant-Based Care Management for High-Risk Patients in Small Primary Care Practices: A Cluster Randomized Clinical Trial. *Ann Intern Med.* 2016;164: 323–330. doi:10.7326/M14-2403
7. Mergenthal K, Beyer M, Gerlach FM, Guethlin C. Sharing Responsibilities within the General Practice Team - A Cross-Sectional Study of Task Delegation in Germany. *PLoS ONE.* 2016;11: e0157248. doi:10.1371/journal.pone.0157248
8. Freund T, Everett C, Griffiths P, Hudon C, Naccarella L, Laurant M. Skill mix, roles and remuneration in the primary care workforce: who are the healthcare professionals in the primary care teams across the world? *Int J Nurs Stud.* 2015;52: 727–743. doi:10.1016/j.ijnurstu.2014.11.014
9. Donald F, Martin-Misener R, Bryant-Lukosius D, Kilpatrick K, Kaasalainen S, Carter N, et al. The primary healthcare nurse practitioner role in Canada. *Nurs Leadersh (Tor Ont).* 2010;23 Spec No 2010: 88–113.
10. Lukewich J, Edge DS, VanDenKerkhof E, Williamson T, Tranmer J. Association between registered nurse staffing and management outcomes of patients with type 2 diabetes within primary care: a cross-sectional linkage study. *CMAJ Open.* 2016;4: E264-270. doi:10.9778/cmajo.20150113
11. Russell GM, Dahrouge S, Hogg W, Geneau R, Muldoon L, Tuna M. Managing chronic disease in ontario primary care: the impact of

- 1  
2  
3 1 organizational factors. *Ann Fam Med*. 2009;7: 309–318.  
4 2 doi:10.1370/afm.982  
5  
6 3 12. Halter M, Drennan V, Chattopadhyay K, Carneiro W, Yiallourous J, de  
7 4 Lusignan S, et al. The contribution of physician assistants in primary care:  
8 5 a systematic review. *BMC Health Serv Res*. 2013;13: 223.  
9 6 doi:10.1186/1472-6963-13-223  
10  
11 7 13. Ruggiero L, Riley BB, Hernandez R, Quinn LT, Gerber BS, Castillo A, et  
12 8 al. Medical assistant coaching to support diabetes self-care among low-  
13 9 income racial/ethnic minority populations: randomized controlled trial.  
14 10 *West J Nurs Res*. 2014;36: 1052–1073. doi:10.1177/0193945914522862  
15  
16 11 14. Bekelman DB, Plomondon ME, Carey EP, Sullivan MD, Nelson KM,  
17 12 Hattler B, et al. Primary Results of the Patient-Centered Disease  
18 13 Management (PCDM) for Heart Failure Study: A Randomized Clinical  
19 14 Trial. *JAMA Intern Med*. 2015;175: 725–732.  
20 15 doi:10.1001/jamainternmed.2015.0315  
21  
22 16 15. Fan VS, Gaziano JM, Lew R, Bourbeau J, Adams SG, Leatherman S, et  
23 17 al. A comprehensive care management program to prevent chronic  
24 18 obstructive pulmonary disease hospitalizations: a randomized, controlled  
25 19 trial. *Ann Intern Med*. 2012;156: 673–683. doi:10.7326/0003-4819-156-10-  
26 20 201205150-00003  
27  
28 21 16. Connor KI, Cheng EM, Barry F, Siebens HC, Lee ML, Ganz DA, et al.  
29 22 Randomized trial of care management to improve Parkinson disease care  
30 23 quality. *Neurology*. 2019;92: e1831–e1842.  
31 24 doi:10.1212/WNL.0000000000007324  
32  
33 25 17. Laurant M, van der Biezen M, Wijers N, Watananirun K, Kontopantelis E,  
34 26 van Vught AJ. Nurses as substitutes for doctors in primary care. *Cochrane*  
35 27 *Database Syst Rev*. 2018;7: CD001271.  
36 28 doi:10.1002/14651858.CD001271.pub3  
37  
38 29 18. Laux G, Kaufmann-Kolle P, Bauer E, Goetz K, Stock C, Szecsenyi J.  
39 30 [Evaluation of family doctor centred medical care based on AOK routine  
40 31 data in Baden-Württemberg]. *Z Evid Fortbild Qual Gesundheitswes*.  
41 32 2013;107: 372–378. doi:10.1016/j.zefq.2013.07.001  
42  
43 33 19. Fricke U, Hein L, Schwabe U. *Neue Arzneimittel 2016*. In: Schwabe U,  
44 34 Paffrath D, Ludwig W-D, Klauber J, editors. *Arzneiverordnungs-Report*  
45 35 2017. Berlin, Heidelberg: Springer Berlin Heidelberg; 2017. pp. 55–135.  
46 36 doi:10.1007/978-3-662-54630-7\_3  
47  
48 37 20. Sundararajan V, Henderson T, Perry C, Muggivan A, Quan H, Ghali WA.  
49 38 New ICD-10 version of the Charlson comorbidity index predicted in-  
50 39 hospital mortality. *J Clin Epidemiol*. 2004;57: 1288–1294.  
51 40 doi:10.1016/j.jclinepi.2004.03.012  
52  
53  
54  
55  
56  
57  
58  
59  
60

- 1  
2  
3 1 21. Freund T, Mahler C, Erler A, Gensichen J, Ose D, Szecsenyi J, et al.  
4 2 Identification of patients likely to benefit from care management programs.  
5 3 Am J Manag Care. 2011;17: 345–352.  
6  
7  
8 4 22. Siebenhofer A, Ulrich L-R, Mergenthal K, Berghold A, Pregartner G,  
9 5 Kemperdick B, et al. Primary care management for patients receiving  
10 6 long-term antithrombotic treatment: A cluster-randomized controlled trial.  
11 7 PLoS ONE. 2019;14: e0209366. doi:10.1371/journal.pone.0209366  
12  
13 8 23. Takeda A, Martin N, Taylor RS, Taylor SJ. Disease management  
14 9 interventions for heart failure. Cochrane Database Syst Rev. 2019;1:  
15 10 CD002752. doi:10.1002/14651858.CD002752.pub4  
16  
17  
18 11 24. Lenferink A, Brusse-Keizer M, van der Valk PD, Frith PA, Zwerink M,  
19 12 Monninkhof EM, et al. Self-management interventions including action  
20 13 plans for exacerbations versus usual care in patients with chronic  
21 14 obstructive pulmonary disease. Cochrane Database Syst Rev. 2017;8:  
22 15 CD011682. doi:10.1002/14651858.CD011682.pub2  
23  
24  
25 16 25. Smith SM, Soubhi H, Fortin M, Hudon C, O'Dowd T. Interventions for  
26 17 improving outcomes in patients with multimorbidity in primary care and  
27 18 community settings. Cochrane Database Syst Rev. 2012; CD006560.  
28 19 doi:10.1002/14651858.CD006560.pub2  
29  
30  
31 20 26. Peytremann-Bridevaux I, Arditi C, Gex G, Bridevaux P-O, Burnand B.  
32 21 Chronic disease management programmes for adults with asthma.  
33 22 Cochrane Database Syst Rev. 2015; CD007988.  
34 23 doi:10.1002/14651858.CD007988.pub2  
35  
36 24 27. Koehler F, Koehler K, Deckwart O, Prescher S, Wegscheider K, Kirwan  
37 25 B-A, et al. Efficacy of telemedical interventional management in patients  
38 26 with heart failure (TIM-HF2): a randomised, controlled, parallel-group,  
39 27 unmasked trial. Lancet. 2018;392: 1047–1057. doi:10.1016/S0140-  
40 28 6736(18)31880-4  
41  
42  
43 29 28. Hesselink G, Schoonhoven L, Barach P, Spijker A, Gademan P, Kalkman  
44 30 C, et al. Improving patient handovers from hospital to primary care: a  
45 31 systematic review. Ann Intern Med. 2012;157: 417–428.  
46 32 doi:10.7326/0003-4819-157-6-201209180-00006  
47  
48 33 29. Braet A, Weltens C, Sermeus W. Effectiveness of discharge interventions  
49 34 from hospital to home on hospital readmissions: a systematic review. JBI  
50 35 Database System Rev Implement Rep. 2016;14: 106–173.  
51 36 doi:10.11124/jbisrir-2016-2381  
52  
53  
54 37  
55  
56 38  
57  
58  
59  
60



**STROBE 2007 (v4) Statement—Checklist of items that should be included in reports of *cross-sectional studies***

| Section/Topic                | Item # | Recommendation                                                                                                                                                                       | Reported on page # |
|------------------------------|--------|--------------------------------------------------------------------------------------------------------------------------------------------------------------------------------------|--------------------|
| <b>Title and abstract</b>    | 1      | (a) Indicate the study's design with a commonly used term in the title or the abstract                                                                                               | 1                  |
|                              |        | (b) Provide in the abstract an informative and balanced summary of what was done and what was found                                                                                  | 2                  |
| <b>Introduction</b>          |        |                                                                                                                                                                                      |                    |
| Background/rationale         | 2      | Explain the scientific background and rationale for the investigation being reported                                                                                                 | 6                  |
| Objectives                   | 3      | State specific objectives, including any prespecified hypotheses                                                                                                                     | 6                  |
| <b>Methods</b>               |        |                                                                                                                                                                                      |                    |
| Study design                 | 4      | Present key elements of study design early in the paper                                                                                                                              | 8                  |
| Setting                      | 5      | Describe the setting, locations, and relevant dates, including periods of recruitment, exposure, follow-up, and data collection                                                      | 9                  |
| Participants                 | 6      | (a) Give the eligibility criteria, and the sources and methods of selection of participants                                                                                          | 8                  |
| Variables                    | 7      | Clearly define all outcomes, exposures, predictors, potential confounders, and effect modifiers. Give diagnostic criteria, if applicable                                             | 9                  |
| Data sources/<br>measurement | 8*     | For each variable of interest, give sources of data and details of methods of assessment (measurement). Describe comparability of assessment methods if there is more than one group | 9                  |
| Bias                         | 9      | Describe any efforts to address potential sources of bias                                                                                                                            | 10                 |
| Study size                   | 10     | Explain how the study size was arrived at                                                                                                                                            | 10                 |
| Quantitative variables       | 11     | Explain how quantitative variables were handled in the analyses. If applicable, describe which groupings were chosen and why                                                         | 10                 |
| Statistical methods          | 12     | (a) Describe all statistical methods, including those used to control for confounding                                                                                                | 10                 |
|                              |        | (b) Describe any methods used to examine subgroups and interactions                                                                                                                  | 10                 |
|                              |        | (c) Explain how missing data were addressed                                                                                                                                          | n/a                |
|                              |        | (d) If applicable, describe analytical methods taking account of sampling strategy                                                                                                   | n/a                |
|                              |        | (e) Describe any sensitivity analyses                                                                                                                                                | 10                 |
| <b>Results</b>               |        |                                                                                                                                                                                      |                    |



|                          |     |                                                                                                                                                                                                              |     |
|--------------------------|-----|--------------------------------------------------------------------------------------------------------------------------------------------------------------------------------------------------------------|-----|
| Participants             | 13* | (a) Report numbers of individuals at each stage of study—eg numbers potentially eligible, examined for eligibility, confirmed eligible, included in the study, completing follow-up, and analysed            | 11  |
|                          |     | (b) Give reasons for non-participation at each stage                                                                                                                                                         | n/a |
|                          |     | (c) Consider use of a flow diagram                                                                                                                                                                           | n/a |
| Descriptive data         | 14* | (a) Give characteristics of study participants (eg demographic, clinical, social) and information on exposures and potential confounders                                                                     | 11  |
|                          |     | (b) Indicate number of participants with missing data for each variable of interest                                                                                                                          | n/a |
| Outcome data             | 15* | Report numbers of outcome events or summary measures                                                                                                                                                         | 12  |
| Main results             | 16  | (a) Give unadjusted estimates and, if applicable, confounder-adjusted estimates and their precision (eg, 95% confidence interval). Make clear which confounders were adjusted for and why they were included | 12  |
|                          |     | (b) Report category boundaries when continuous variables were categorized                                                                                                                                    | n/a |
|                          |     | (c) If relevant, consider translating estimates of relative risk into absolute risk for a meaningful time period                                                                                             | n/a |
| Other analyses           | 17  | Report other analyses done—eg analyses of subgroups and interactions, and sensitivity analyses                                                                                                               | 12  |
| <b>Discussion</b>        |     |                                                                                                                                                                                                              |     |
| Key results              | 18  | Summarise key results with reference to study objectives                                                                                                                                                     | 13  |
| Limitations              | 19  | Discuss limitations of the study, taking into account sources of potential bias or imprecision. Discuss both direction and magnitude of any potential bias                                                   | 15  |
| Interpretation           | 20  | Give a cautious overall interpretation of results considering objectives, limitations, multiplicity of analyses, results from similar studies, and other relevant evidence                                   | 16  |
| Generalisability         | 21  | Discuss the generalisability (external validity) of the study results                                                                                                                                        | 15  |
| <b>Other information</b> |     |                                                                                                                                                                                                              |     |
| Funding                  | 22  | Give the source of funding and the role of the funders for the present study and, if applicable, for the original study on which the present article is based                                                | 17  |

\*Give information separately for cases and controls in case-control studies and, if applicable, for exposed and unexposed groups in cohort and cross-sectional studies.

**Note:** An Explanation and Elaboration article discusses each checklist item and gives methodological background and published examples of transparent reporting. The STROBE checklist is best used in conjunction with this article (freely available on the Web sites of PLoS Medicine at <http://www.plosmedicine.org/>, Annals of Internal Medicine at <http://www.annals.org/>, and Epidemiology at <http://www.epidem.com/>). Information on the STROBE Initiative is available at [www.strobe-statement.org](http://www.strobe-statement.org).

# BMJ Open

## Effect of involving certified health care assistants in primary care in Germany: A cross-sectional study

|                                 |                                                                                                                                                                                                                                                                                                                                                                                                                                                                                                                                                                |
|---------------------------------|----------------------------------------------------------------------------------------------------------------------------------------------------------------------------------------------------------------------------------------------------------------------------------------------------------------------------------------------------------------------------------------------------------------------------------------------------------------------------------------------------------------------------------------------------------------|
| Journal:                        | <i>BMJ Open</i>                                                                                                                                                                                                                                                                                                                                                                                                                                                                                                                                                |
| Manuscript ID                   | bmjopen-2019-033325.R2                                                                                                                                                                                                                                                                                                                                                                                                                                                                                                                                         |
| Article Type:                   | Original research                                                                                                                                                                                                                                                                                                                                                                                                                                                                                                                                              |
| Date Submitted by the Author:   | 14-Nov-2019                                                                                                                                                                                                                                                                                                                                                                                                                                                                                                                                                    |
| Complete List of Authors:       | Senft, Jonas; University Hospital Heidelberg, Department of General Practice and Health Services Research;<br>Wensing , M; University Hospital Heidelberg, Department of General Practice and Health Services Research<br>Poss-Doering, Regina; University Hospital Heidelberg, Department of General Practice and Health Services Research<br>Szecsenyi, Joachim; University Hospital Heidelberg, Department of General Practice and Health Services Research<br>Laux, Gunter; UniversitatsKlinikum Heidelberg, General Practice and Health Services Research |
| <b>Primary Subject Heading</b>: | Geriatric medicine                                                                                                                                                                                                                                                                                                                                                                                                                                                                                                                                             |
| Secondary Subject Heading:      | Health services research, Medical education and training, General practice / Family practice                                                                                                                                                                                                                                                                                                                                                                                                                                                                   |
| Keywords:                       | GENERAL MEDICINE (see Internal Medicine), HEALTH SERVICES ADMINISTRATION & MANAGEMENT, HEALTH ECONOMICS                                                                                                                                                                                                                                                                                                                                                                                                                                                        |
|                                 |                                                                                                                                                                                                                                                                                                                                                                                                                                                                                                                                                                |

SCHOLARONE™  
Manuscripts

1  
2  
3 **1 Effect of involving certified health care assistants in primary**  
4 **2 care in Germany: A cross-sectional study**

5  
6  
7  
8 3 Short title: Effect of involving certified health care assistants in primary care in  
9  
10 4 Germany

11  
12  
13 5 Jonas D. Senft<sup>1</sup>, Michel Wensing<sup>1</sup>, Regina Poss-Doering<sup>1</sup>, Joachim Szecsenyi<sup>1</sup>,  
14  
15  
16 6 Gunter Laux<sup>1</sup>

17  
18  
19  
20 8 <sup>1</sup>Department of General Practice and Health Services Research, University  
21  
22  
23 9 Hospital Heidelberg, Im Neuenheimer Feld 130.3, 69120 Heidelberg, Germany

24  
25  
26  
27 11 Funding: This study was funded by institutional means of the University of  
28  
29  
30 12 Heidelberg.

31  
32  
33  
34 14 Corresponding author information:

35 15 Jonas D. Senft, MD

36 16 Department of General Practice and Health Services Research

37 17 University Hospital Heidelberg

38 18 Im Neuenheimer Feld 130.3

39 19 69120 Heidelberg, Germany

40 20 Tel+49(0)6221-56-4743

41 21 Fax +49 (0)6221-56-1972

42 22 E-Mail: [jonas.senft@med.uni-heidelberg.de](mailto:jonas.senft@med.uni-heidelberg.de)

43  
44  
45  
46  
47  
48  
49  
50  
51  
52  
53  
54  
55  
56  
57  
58  
59  
60

1  
2  
3 **1 Abstract**  
4

5 **2 Objectives:** Growing prevalence of chronic diseases and limited resources are  
6  
7 key challenges for future health care. As a promising approach to maintain high-  
8  
9 quality primary care, non-physician health care professionals have been trained  
10  
11 to broaden qualifications and responsibilities. This study aimed to assess the  
12  
13 influence of involving certified health care assistants (HCAs, German: VERAH)  
14  
15 on quality and efficacy of primary care in Germany.  
16  
17

18  
19 **8 Design:** Cross-sectional study  
20

21  
22 **9 Setting:** Primary care  
23

24 **10 Participants:** Patients insured by the AOK statutory health insurer (Allgemeine  
25  
26 Ortskrankenkasse, Baden-Wuerttemberg, Germany).  
27

28 **12 Interventions:** Since 2008 practice assistants in Germany can enhance their  
29  
30 professional education to become certified HCAs.  
31

32  
33 **14 Primary and secondary outcome measures:** Claims data related to patients  
34  
35 treated in practices employing at least one HCA were compared to data from  
36  
37 practices not employing HCAs to determine frequency of consultations, hospital  
38  
39 admissions and readmissions. Economic analysis comprised hospitalization  
40  
41 costs, prescriptions of follow-on drugs and outpatient medication costs.  
42  
43

44 **19 Results:** A total of 397,493 patients were treated in HCA practices, 463,730  
45  
46 patients attended to non-HCA practices. Patients in HCA practices had an 8.2%  
47  
48 lower rate of specialist consultations ( $p<0.0001$ ), a 4.0% lower rate of  
49  
50 hospitalizations ( $p<0.0001$ ), a 3.5% lower rate of readmissions ( $p=0.0463$ ), a  
51  
52 14.2% lower rate of follow-on drug prescriptions ( $p<0.0001$ ) and 4.7% lower  
53  
54 costs of total medication ( $p<0.0001$ ). No difference was found regarding the  
55  
56 consultation rate of general practitioners and hospital costs.  
57  
58  
59  
60

1  
2  
3 1 **Conclusions:** For the first time this high-volume claims data analysis showed  
4  
5 2 that involving HCAs in primary care in Germany is associated with a reduction  
6  
7 3 in hospital admissions, specialist consultations and medication costs.  
8  
9  
10 4 Consequently, broadening qualifications may be a successful strategy not only  
11  
12 5 to share physicians' work load but to improve quality and efficacy in primary  
13  
14 6 care to meet future challenges. Future studies may explore specific tasks to be  
15  
16  
17 7 shared with non-physician workforces and standardization of the professional  
18  
19 8 role.  
20  
21  
22  
23  
24  
25  
26  
27  
28  
29  
30  
31  
32  
33  
34  
35  
36  
37  
38  
39  
40  
41  
42  
43  
44  
45  
46  
47  
48  
49  
50  
51  
52  
53  
54  
55  
56  
57  
58  
59  
60

## 1 **Strengths and limitations of this study**

- 2 • This is the first high-volume claims data analysis assessing the effect of  
3 involving higher qualified practice assistants on quality and efficacy health  
4 care indicators in Germany.
- 5 • The analysis is performed on a comprehensive sample of data of one year  
6 covering 861,223 patients.
- 7 • Statistical adjustment was possible for relevant patient-sided factors like  
8 patients' age and morbidity, nursing care level and structural factors like  
9 practice size, urbanization and type (single or group practice).
- 10 • Due to the limitations given by the nature of claims data, further potentially  
11 relevant factors like educational level and experience of the staff were not  
12 available for this analysis.
- 13 • The professional role of HCAs in Germany is not standardized, thus  
14 limitations are given to the transferability of the intervention.

1  
2  
3 **1 Abbreviations:**  
4

5  
6 2 AOK statutory health insurance provider (German: Allgemeine  
7  
8 3 Ortskrankenkasse)  
9  
10 4 GP general practitioner  
11  
12 5 HCA health care assistant  
13  
14 6 HZV GP-centered care (German: Hausarztzentrierte Versorgung)  
15  
16 7 PZN central pharmaceutical number (Pharmazentralnummer)  
17  
18  
19  
20  
21  
22  
23  
24  
25  
26  
27  
28  
29  
30  
31  
32  
33  
34  
35  
36  
37  
38  
39  
40  
41  
42  
43  
44  
45  
46  
47  
48  
49  
50  
51  
52  
53  
54  
55  
56  
57  
58  
59  
60

For peer review only

## 1 Introduction

2 All over the globe, providing access to high-quality primary care is a challenge  
3 for health care systems. In the view of growing prevalence of chronic diseases  
4 and limited health care resources, physicians are confronted with increasing  
5 numbers of consultations while time is very limited [1,2].

6 Particularly in times of evidence-based practice and growing use of treatment  
7 algorithms, time is needed to meet patient's individual preferences or  
8 circumstances, which are deciding factors for treatment success [3,4].

9 Consequently, strategies are needed to maintain access to high-quality general  
10 practice. As a promising worldwide approach, highly qualified non-physician  
11 health care professionals such as practice nurses in the U.S. or in Australia are  
12 trained to take a more active role in primary care, particularly in treatment of  
13 patients with chronic diseases [5–8]. For primary healthcare registered nurses  
14 and nurse practitioners in Canada, there is growing evidence that their  
15 involvement in practices is associated with health promotion, particularly in the  
16 management of chronic diseases [9–11].

17 While qualified nurses are well integrated in primary care in other countries, in  
18 Germany so far there is no professional role for nurses in general medicine. On  
19 the other hand, non-academic workforces like practice or medical assistants  
20 have become increasingly involved into active patient care as they have been  
21 integrated into treatment monitoring or patient coaching for chronic diseases  
22 like diabetes e.g. in the United States [8,12,13]. In Germany, general  
23 practitioners (GP) usually employ certified practice assistants, who absolved  
24 professional training for three years and traditionally performed clerical duties  
25 like reception and routine tasks, such as blood sampling or electrocardiogram



1 recording. Since 2008 practical assistants may undergo an additional training  
2 program of 200 hours to become certified as a so-called health care assistant  
3 (German: "Versorgungsassistent/in in der Hausarztpraxis", VERAH). Health  
4 care assistants (HCAs) are qualified to be closer involved in primary care  
5 delivery performing tasks such as team-based case management and  
6 monitoring of chronically-ill patients, routine home visits, and wound care [7].  
7 However, to date there is only limited knowledge about the effect of broadening  
8 skills and responsibilities of non-physician workforces on quality and efficacy of  
9 primary care. Recent RCTs did not find a beneficial effect of disease  
10 management programs led by non-physician work forces on care indicators like  
11 hospitalization rate or health care costs [14–16]. A recent meta-analysis of 18  
12 RCTs assessing the influence of nurses working as a substitute for physicians  
13 showed that nurse-led care may be equal in terms of health outcomes like  
14 control of diabetes and blood pressure and patient satisfaction [17].  
15 However, no evidence-based conclusion can be drawn currently with regard to  
16 the influence of involving higher qualified non-physician workforce on health  
17 care efficacy indicators like hospitalization rate, specialist consultations and  
18 costs. Furthermore, common sample sizes of available RCTs may be  
19 underpowered to capture effects in this regard. The aim of this study was to  
20 assess the influence of involving certified health care assistants on quality and  
21 efficacy of primary care in Germany. For this purpose, for the first time a high-  
22 volume claims data cross-sectional study was performed.

## 1 **Methods**

### 2 Study Design

3 A cross-sectional study was conducted. Claims data related to patients treated  
4 in general practices between January 1 and December 31, 2014 were supplied  
5 by the AOK statutory health insurance company (German: "Allgemeine  
6 Ortskrankenkasse", Baden-Wuerttemberg, Germany). Data of patients treated  
7 in practices employing at least one certified HCA were compared to data from  
8 practices not employing HCAs (non-HCA) to assess the influence of involving  
9 HCAs in primary care delivery. Ethical approval for this study was given by the  
10 local institutional Ethics Committee of the University Hospital Heidelberg (No.  
11 S-359/2013).

### 12 Study population

13 Secondary data related to patients insured by the AOK statutory health  
14 insurance company of Baden-Wuerttemberg, Germany, and participating in a  
15 specific primary care program in Germany (GP-centred care; German:  
16 "Hausarztzentrierte Versorgung" (HZV)) were eligible for data analysis. The  
17 federal state of Baden-Wuerttemberg has a population of about 10.7 million and  
18 AOK is the largest statutory health insurer with about 4 million insured persons.  
19 The HZV program is a large-scale, legally stipulated care concept encouraging  
20 patients to enroll with a general practitioner (GP), aiming to strengthen primary  
21 care and to enhance health care for patients with chronic diseases and complex  
22 health care needs [18]. Secondary patient data were included in the analysis, if  
23 patients met the following criteria: aged 18 years or older, living in Baden-  
24 Wuerttemberg, at least one visit to the primary care physician in the relevant

1  
2  
3 1 year, no registration with other primary care contracts (e.g., integrated care  
4  
5 2 contracts), no interruptions of registration to HZV program in the relevant year.

### 3 Intervention

4 Since 2008, practice assistants working in practices participating in the HZV  
5 program in Germany, can enhance their professional education by attending a  
6 standardized curriculum of 200 teaching units of theoretical and practical  
7 lessons. Upon mandatory examination, these practice assistants become state-  
8 certified as HCA (German: VERAH) [7]. Besides routine tasks like blood  
9 sampling, electrocardiogram recording or spirometry, HCAs are thought to  
10 perform monitoring of chronically-ill patients, prevention measures, routine  
11 home visits and wound care management.

### 12 Data acquisition and outcome parameters

13 Secondary patient data were recorded by the AOK state health insurance  
14 company for reimbursement purposes and continuous evaluation of the HZV  
15 program. For the analysis, data were supplied by the AOK to the Department  
16 of General Practice and Health Services Research, University Hospital  
17 Heidelberg. Practices employing certified HCAs could be unambiguously  
18 identified since employment of HCAs is obligatorily reimbursed by state health  
19 insurance in the HZV program. The claims data consisted of several data sets,  
20 containing particular information on patient care (e. g. GP consultations,  
21 prescriptions and hospitalizations). These data could be linked on the basis of  
22 a unique patient identifier. Data linkage was performed by our research team  
23 using a relational database. Subjects cannot be identified, directly or through  
24 identifiers linked to the subjects. Data storage and extraction were performed  
25 with MySQL Community Server x64 (Oracle Corporation, Redwood Shores,

1 CA, USA). All national and institutional guidelines concerning data acquisition  
2 for retrospective analyses were followed at all times.

3 The obtained data set comprised age, gender, diagnoses according to ICD-10  
4 coding as well as accounting data on consultations, prescribed medication and  
5 hospital stays.

6 To assess the effect of involving HCAs on quality and efficacy of primary care,  
7 the following outcome parameters were analyzed: GP consultations, specialist  
8 consultations, hospital admissions, hospital readmissions within 4 weeks,  
9 hospitalization costs, prescription of follow-on drugs and outpatient medication  
10 costs. The number of GP and specialist consultations per patient could be  
11 determined by the codes according to the EBM system (“Einheitlicher  
12 Bewertungsmaßstab”) used for accounting of outpatient medical services in  
13 Germany. Number of hospital admissions and readmissions per patient as well  
14 as per-patient costs for hospitalization in € was determined by the recorded  
15 Diagnosis Related Groups (DRG) codes used for reimbursement of inpatient  
16 medical services in Germany. The per-patient number of prescriptions of so-  
17 called follow-on drugs, patent-secured marginally altered pharmaceuticals with  
18 no benefit compared to the prototype drug according to evidence-based criteria  
19 [19], was determined by records of the central pharmaceutical numbers of  
20 prescribed medications (“Pharmazentralnummer”, PZN). Outpatient medication  
21 costs per patient in € could be determined by accounting data for prescriptions  
22 reimbursed by the AOK state health insurance.

### 23 Statistical analysis

24 The full sample of available claims data was used for the analysis. In order to  
25 calculate frequencies, rates and percentages, we used SAS PROC SQL. In

1 order to assess the adjusted outcomes of interest, we used SAS PROC  
2 GENMOD (SAS V.9.4×64, SAS Institute). There was no missing data within the  
3 underlying data set. If there was no utilization for a particular patient, e.g. no  
4 hospitalization, this was denoted as “0”. The following factors were selected ex  
5 ante for the adjustment of the comparison between groups: patient age, sex,  
6 morbidity according to Charlson Index [20], nursing home as residence, nursing  
7 care level (legally defined 4-point scale to assess need for nursing support),  
8 urbanization (rural, urban), practice size (number of contacts in relevant  
9 period), type of practice (single, group). Comparison between groups was done  
10 by multivariable regression analysis, which the three-level clustering of  
11 patients, GPs and practices into account. Depending on the distribution of each  
12 outcome, linear regression, negative-binomial regression or Poisson  
13 regression models (for count data) were used. Since multiple hypotheses were  
14 tested in this analysis, the Bonferroni correction was used to compensate for  
15 multiple comparisons. For all analyses, results were considered statistically  
16 significant, if the p value was 0.05 or less.

#### 17 Patient and public involvement

18 Exploring strategies to provide and maintain access to high-quality primary care  
19 is of public interest, particularly in the view of growing prevalence of chronic  
20 diseases and limited health care resources. Due to the retrospective study  
21 design based on an analysis of pseudonymized data, patients could not be  
22 identified, nor be informed or involved into this study. The public dissemination  
23 of the results is intended to be achieved by scientific publication.

## 1 Results

2 861,223 patients were evaluated in the observation period from January 1 to  
3 December 31, 2014. 397.493 patients were treated in practices involving at  
4 least one HCA to primary care (HCA group), 463.730 patients were seen in  
5 practices, which did not employ HCAs (non-HCA group). Patients  
6 characteristics are shown in Table 1.

Table 1: Patient characteristics: Data of patients treated in practices employing  
at least one HCA compared to practices not employing HCAs (non-HCA)

|                    | HCA            | Non-HCA        | p       |
|--------------------|----------------|----------------|---------|
| Number of patients | 397493         | 463730         |         |
| Male (N, %)        | 174415 (43.9%) | 200775 (43.2%) | <0.0001 |
| Age                | 56.9 ± 18.5    | 58.4 ± 18.1    | <0.0001 |
| Charlson Index     | 1.37 ± 2.0     | 1.38 ± 1.98    | <0.0001 |
| Care level [N]     |                |                | <0.0001 |
| No care:           | 378919         | 442024         |         |
| I:                 | 11186          | 13165          |         |
| II:                | 5771           | 6765           |         |
| III:               | 1593           | 1751           |         |
| IV:                | 24             | 25             |         |

Continuous values are presented as mean ± standard deviation; HCA: health care assistant;

7 According to the adjusted analysis, patients in the HCA-group had an 8.2%  
8 lower rate of specialist consultations (p<0.0001). Per-patient number of hospital  
9 admissions was 4.0% lower (p<0.0001) and number of hospital readmissions  
10 was 3.5% lower in the HCA group (p=0.0463). Prescriptions of follow-on drugs  
11 were 14.2% lower and total outpatient medication costs were 4.69% lower in  
12 the HCA-group respectively (p<0.0001). No difference was found regarding the  
13 number of GP consultations and hospitalization costs (Table 2).

Table 2: Outcomes: Outcome parameters for patients treated in practices employing at least one HCA compared to practices not employing HCAs (non-HCA)

| Per-patient outcome             | Unadjusted Outcome |               | Adjusted Difference (AD) HCA vs. non-HCA |         |         |
|---------------------------------|--------------------|---------------|------------------------------------------|---------|---------|
|                                 | HCA                | Non-HCA       | AD [95%CI]                               | AD in % | p       |
| GP consultations                | 13.46 ± 11.42      | 13.72 ± 11.81 | -0.063 ± 0.021 [-0.105, -0.022]          | -0.21%  | 0.0028  |
| Specialist consultations        | 4.59 ± 8.23        | 4.89 ± 8.38   | -0.209 ± 0.018 [-0.245, 0.173]           | -8.21%  | <0.0001 |
| Hospital admissions             | 0.272 ± 0.762      | 0.286 ± 0.790 | -0.013 ± 0.008 [-0.057, -0.025]          | -4.00%  | <0.0001 |
| Hospital readmissions           | 0.210 ± 0.682      | 0.216 ± 0.721 | -0.036 ± 0.018 [-0.071, -0.006]          | -3.53%  | 0.0463  |
| Hospitalization costs [€]       | 6,239 ± 9,388      | 6319 ± 9278   | -40.42 ± 0.005 [-0.018, 0.003]           | 0.73%   | 0.1711  |
| Prescription of follow-on drugs | 3.12 ± 10.15       | 3.57 ± 10.89  | -0.388 ± 0.026 [-0.437, -0.334]          | -14.2%  | <0.0001 |
| Outpatient medication costs [€] | 1,333 ± 59,877     | 1376 ± 51567  | -71.01 ± 0.011 [-0.070, -0.026]          | 4.69%   | <0.0001 |

Values are presented as mean ± standard deviation; AD: adjusted difference; GP: general practitioner;

HCA: health care assistant; CI: confidence interval

## 1 Discussion

2 For the first time, this cross-sectional study assessed high-volume claims data  
3 to evaluate the influence of involving HCAs on quality and efficacy of primary  
4 care in Germany. The analysis of care-related data of 861,223 patients showed  
5 a lower rate of hospital admissions, specialist consultations as well as lower  
6 outpatient medication costs when HCAs were part of the practice staff.  
7 Although the measured effect is low-scaled, it is of high relevance for the  
8 development of future primary care concepts. From a patient-centered view,  
9 avoiding hospitalization or unnecessary medication may help to reduce  
10 patients' burden and morbidity due to hospital stay or pharmacological side-  
11 effects. On the other hand, avoidable treatment will be not only a central  
12 determinant of quality, but a key cost factor for health care systems, which will  
13 be challenged by the rising prevalence of chronic diseases in the future.

14 The measured effect may be hypothesized to be due to an improved patient  
15 access to primary care. Either directly by being attended to by an HCA, or  
16 indirectly by improvement of workflow, patients may benefit from a higher  
17 quality and efficacy of care. Hospitalizations and specialist consultations may  
18 be avoided by a more intensive outpatient care facilitated by HCA involvement.  
19 Particularly, patients with chronic diseases may benefit from extended services  
20 like intense monitoring, education and reminders [21]. And eventually, costs for  
21 prescriptions may be reduced by efficient management of medication regimen.

22 To date, knowledge about potential effects of involving higher qualified non-  
23 physician healthcare professionals in primary care is low. Several RCTs  
24 evaluating disease management programs for chronic conditions like chronic  
25 pulmonary disease or heart failure involved practice assistants with enhanced



1 educational training and responsibilities, however, did not prove an effect of  
2 these programs on relevant care indicators [6,15,22]. A potential reason for  
3 this contrast to our findings may be an underpowered sample-size postulating  
4 a reduction of avoidable hospitalizations up to 20%. The results of our study  
5 show a much smaller effect with a reduction of 4% hospitalizations when HCAs  
6 were involved, which in our opinion is closer to reality in primary care. As a  
7 comparison, even in settings of complex disease management programs for  
8 heart failure patients, low rates of reduction in all-cause hospitalization are  
9 common when involving academically educated non-physician work forces and  
10 specialist physicians, with a range of up to 8% as a recent meta-analysis of 12  
11 RCTs showed [23].

12 Another relevant finding of this study is that the rate of GP consultations was  
13 only slightly reduced by 0.21% when HCAs were involved. This is noteworthy,  
14 since a distinct reduction of GP consultations might have been expected  
15 assuming that HCAs perform chosen routine tasks independently. On the  
16 other hand, this result may reflect that involvement of HCAs is not implemented  
17 as a one-way delegation or as a substitution for physician care as has been  
18 proposed for nurse-led care concepts [17], but more as a team interaction.  
19 However, no conclusion can be drawn by this study with regard to the specific  
20 role of HCAs within the practice staff. As a recent survey showed, in Germany  
21 there is no firmly standardized professional role for HCAs. Performed tasks  
22 differ widely from simple patient assessment or basic wound care to tasks with  
23 substantial responsibility like emergency home visits, chronic care  
24 management or treatment of complex wounds [7]. Eventually, the GP decides  
25 which tasks are performed by HCAs and to what extent they perform them

1 independently. While this approach meets individual eligibility, more  
2 standardization may be favourable to identify tasks to be shared in teams  
3 according to their effect on care quality and efficacy. Furthermore, it could help  
4 to reveal potential limitations, as found in nurse-led self-management programs  
5 of COPD, which have been associated with higher airway-related mortality  
6 [15,24]. A promising approach for a standardized involvement of HCAs certainly  
7 lies in chronic disease management programs, which proved to be efficient for  
8 heart failure or asthma bronchiale [23,25,26]. Furthermore, patient monitoring  
9 by HCAs could be supported using new IT-based methods such as web-based  
10 telemedical care, which has been shown to prevent hospital admissions and  
11 reduce all-cause mortality in heart failure patients [27]. Finally, involving HCAs  
12 in standardized translational approaches after hospital release may be  
13 promising to reduce readmission rates [28,29].

14 Limitations are given by the study design and the associated risk of confounding  
15 factors. Due to the nature of claims data, the parameters available for analysis  
16 were limited. The omission of practice details was an important element of the  
17 data protection contract for participating practices with the objective not to be  
18 identifiable by researchers. Thus, further potentially relevant factors such as  
19 educational level and experience of the staff or structural characteristics of the  
20 practices like equipment or procedural factors such as available diagnostics  
21 and treatment options, were not available for this analysis. Furthermore, the  
22 evaluation of relevant patient-reported outcomes such as quality of life was not  
23 possible in this analysis. Consequently, in our opinion a structure-process-  
24 outcome model was not feasible to be applied in this study. On the other hand,  
25 we deliberately chose claims data for this analysis due to the high volume and

1  
2  
3 1 statistical power necessary to assess the chosen outcomes. Furthermore, in  
4  
5 2 our opinion the available structural factors included in this analysis represent  
6  
7 3 an appropriate and best possible adjustment for the measured outcomes.  
8  
9  
10 4 This high-volume cross-sectional study showed that involving HCAs in primary  
11  
12 5 care in Germany is associated with a reduction in hospital admissions,  
13  
14 6 specialist consultations and overall medication costs. Consequently,  
15  
16 7 broadening qualifications and responsibilities of non-physician work forces may  
17  
18 8 be a successful strategy not only to alleviate physicians' workload, but to  
19  
20 9 improve quality and efficacy of primary care to meet future health care  
21  
22 10 challenges. Further studies should explore specific tasks to be shared with non-  
23  
24  
25  
26 11 physician workforces and standardization of the professional role.  
27  
28  
29  
30  
31  
32  
33  
34  
35  
36  
37  
38  
39  
40  
41  
42  
43  
44  
45  
46  
47  
48  
49  
50  
51  
52  
53  
54  
55  
56  
57  
58  
59  
60

## **Acknowledgements**

1 We would like to thank the statutory health insurance provider AOK Baden-  
2 Wuerttemberg (Germany) for providing pseudonymized data for this analysis.

## **Contributors**

3 Jonas D. Senft: design and methods, writing the article; Regina Poss-Doering:  
4 data interpretation, revision of the article; Michel Wensing: data interpretation,  
5 revision of the article; Joachim Szecsenyi: design and methods, revision of the  
6 article; Gunter Laux: design and methods, statistical analysis, revision of the  
7 article. All authors commented on the draft and approved the final version of  
8 the manuscript.

## **Competing interests**

9 The authors Jonas D. Senft, Regina Poss-Doering, Michel Wensing, Joachim  
10 Szecsenyi and Gunter Laux have no competing interests or financial ties to  
11 declare. Data was supplied by the statutory health insurance AOK Baden-  
12 Wuerttemberg, which had no role in analysis, interpretation, or publication of  
13 the data.

## **Funding**

14 The authors have not declared a specific grant for this research from any  
15 funding agency in the public, commercial or not-for-profit sectors.

## **Data sharing statement**

16 Data used in this analysis are not in the public domain and use is covered by  
17 data sharing agreements with the AOK Baden-Wuerttemberg.

**References:**

1. Wolff JL, Starfield B, Anderson G. Prevalence, expenditures, and complications of multiple chronic conditions in the elderly. *Arch Intern Med.* 2002;162: 2269–2276. doi:10.1001/archinte.162.20.2269
2. Fried TR, Tinetti ME, Iannone L. Primary care clinicians' experiences with treatment decision making for older persons with multiple conditions. *Arch Intern Med.* 2011;171: 75–80. doi:10.1001/archinternmed.2010.318
3. Zolnieriek KBH, Dimatteo MR. Physician communication and patient adherence to treatment: a meta-analysis. *Med Care.* 2009;47: 826–834. doi:10.1097/MLR.0b013e31819a5acc
4. Kelley JM, Kraft-Todd G, Schapira L, Kossowsky J, Riess H. The influence of the patient-clinician relationship on healthcare outcomes: a systematic review and meta-analysis of randomized controlled trials. *PLoS ONE.* 2014;9: e94207. doi:10.1371/journal.pone.0094207
5. Ghorob A, Bodenheimer T. Sharing the care to improve access to primary care. *N Engl J Med.* 2012;366: 1955–1957. doi:10.1056/NEJMp1202775
6. Freund T, Peters-Klimm F, Boyd CM, Mahler C, Gensichen J, Erler A, et al. Medical Assistant-Based Care Management for High-Risk Patients in Small Primary Care Practices: A Cluster Randomized Clinical Trial. *Ann Intern Med.* 2016;164: 323–330. doi:10.7326/M14-2403
7. Mergenthal K, Beyer M, Gerlach FM, Guethlin C. Sharing Responsibilities within the General Practice Team - A Cross-Sectional Study of Task Delegation in Germany. *PLoS ONE.* 2016;11: e0157248. doi:10.1371/journal.pone.0157248
8. Freund T, Everett C, Griffiths P, Hudon C, Naccarella L, Laurant M. Skill mix, roles and remuneration in the primary care workforce: who are the healthcare professionals in the primary care teams across the world? *Int J Nurs Stud.* 2015;52: 727–743. doi:10.1016/j.ijnurstu.2014.11.014
9. Donald F, Martin-Misener R, Bryant-Lukosius D, Kilpatrick K, Kaasalainen S, Carter N, et al. The primary healthcare nurse practitioner role in Canada. *Nurs Leadersh (Tor Ont).* 2010;23 Spec No 2010: 88–113.
10. Lukewich J, Edge DS, VanDenKerkhof E, Williamson T, Tranmer J. Association between registered nurse staffing and management outcomes of patients with type 2 diabetes within primary care: a cross-sectional linkage study. *CMAJ Open.* 2016;4: E264-270. doi:10.9778/cmajo.20150113
11. Russell GM, Dahrouge S, Hogg W, Geneau R, Muldoon L, Tuna M. Managing chronic disease in ontario primary care: the impact of

- 1  
2  
3 1 organizational factors. *Ann Fam Med*. 2009;7: 309–318.  
4 2 doi:10.1370/afm.982  
5  
6 3 12. Halter M, Drennan V, Chattopadhyay K, Carneiro W, Yiallourous J, de  
7 4 Lusignan S, et al. The contribution of physician assistants in primary care:  
8 5 a systematic review. *BMC Health Serv Res*. 2013;13: 223.  
9 6 doi:10.1186/1472-6963-13-223  
10  
11 7 13. Ruggiero L, Riley BB, Hernandez R, Quinn LT, Gerber BS, Castillo A, et  
12 8 al. Medical assistant coaching to support diabetes self-care among low-  
13 9 income racial/ethnic minority populations: randomized controlled trial.  
14 10 *West J Nurs Res*. 2014;36: 1052–1073. doi:10.1177/0193945914522862  
15  
16 11 14. Bekelman DB, Plomondon ME, Carey EP, Sullivan MD, Nelson KM,  
17 12 Hattler B, et al. Primary Results of the Patient-Centered Disease  
18 13 Management (PCDM) for Heart Failure Study: A Randomized Clinical  
19 14 Trial. *JAMA Intern Med*. 2015;175: 725–732.  
20 15 doi:10.1001/jamainternmed.2015.0315  
21  
22 16 15. Fan VS, Gaziano JM, Lew R, Bourbeau J, Adams SG, Leatherman S, et  
23 17 al. A comprehensive care management program to prevent chronic  
24 18 obstructive pulmonary disease hospitalizations: a randomized, controlled  
25 19 trial. *Ann Intern Med*. 2012;156: 673–683. doi:10.7326/0003-4819-156-10-  
26 20 201205150-00003  
27  
28 21 16. Connor KI, Cheng EM, Barry F, Siebens HC, Lee ML, Ganz DA, et al.  
29 22 Randomized trial of care management to improve Parkinson disease care  
30 23 quality. *Neurology*. 2019;92: e1831–e1842.  
31 24 doi:10.1212/WNL.0000000000007324  
32  
33 25 17. Laurant M, van der Biezen M, Wijers N, Watananirun K, Kontopantelis E,  
34 26 van Vught AJ. Nurses as substitutes for doctors in primary care. *Cochrane*  
35 27 *Database Syst Rev*. 2018;7: CD001271.  
36 28 doi:10.1002/14651858.CD001271.pub3  
37  
38 29 18. Laux G, Kaufmann-Kolle P, Bauer E, Goetz K, Stock C, Szecsenyi J.  
39 30 [Evaluation of family doctor centred medical care based on AOK routine  
40 31 data in Baden-Württemberg]. *Z Evid Fortbild Qual Gesundheitswes*.  
41 32 2013;107: 372–378. doi:10.1016/j.zefq.2013.07.001  
42  
43 33 19. Fricke U, Hein L, Schwabe U. *Neue Arzneimittel 2016*. In: Schwabe U,  
44 34 Paffrath D, Ludwig W-D, Klauber J, editors. *Arzneiverordnungs-Report*  
45 35 2017. Berlin, Heidelberg: Springer Berlin Heidelberg; 2017. pp. 55–135.  
46 36 doi:10.1007/978-3-662-54630-7\_3  
47  
48 37 20. Sundararajan V, Henderson T, Perry C, Muggivan A, Quan H, Ghali WA.  
49 38 New ICD-10 version of the Charlson comorbidity index predicted in-  
50 39 hospital mortality. *J Clin Epidemiol*. 2004;57: 1288–1294.  
51 40 doi:10.1016/j.jclinepi.2004.03.012  
52  
53  
54  
55  
56  
57  
58  
59  
60

- 1  
2  
3 1 21. Freund T, Mahler C, Erler A, Gensichen J, Ose D, Szecsenyi J, et al.  
4 2 Identification of patients likely to benefit from care management programs.  
5 3 Am J Manag Care. 2011;17: 345–352.  
6  
7  
8 4 22. Siebenhofer A, Ulrich L-R, Mergenthal K, Berghold A, Pregartner G,  
9 5 Kemperdick B, et al. Primary care management for patients receiving  
10 6 long-term antithrombotic treatment: A cluster-randomized controlled trial.  
11 7 PLoS ONE. 2019;14: e0209366. doi:10.1371/journal.pone.0209366  
12  
13 8 23. Takeda A, Martin N, Taylor RS, Taylor SJ. Disease management  
14 9 interventions for heart failure. Cochrane Database Syst Rev. 2019;1:  
15 10 CD002752. doi:10.1002/14651858.CD002752.pub4  
16  
17  
18 11 24. Lenferink A, Brusse-Keizer M, van der Valk PD, Frith PA, Zwerink M,  
19 12 Monninkhof EM, et al. Self-management interventions including action  
20 13 plans for exacerbations versus usual care in patients with chronic  
21 14 obstructive pulmonary disease. Cochrane Database Syst Rev. 2017;8:  
22 15 CD011682. doi:10.1002/14651858.CD011682.pub2  
23  
24  
25 16 25. Smith SM, Soubhi H, Fortin M, Hudon C, O'Dowd T. Interventions for  
26 17 improving outcomes in patients with multimorbidity in primary care and  
27 18 community settings. Cochrane Database Syst Rev. 2012; CD006560.  
28 19 doi:10.1002/14651858.CD006560.pub2  
29  
30  
31 20 26. Peytremann-Bridevaux I, Arditi C, Gex G, Bridevaux P-O, Burnand B.  
32 21 Chronic disease management programmes for adults with asthma.  
33 22 Cochrane Database Syst Rev. 2015; CD007988.  
34 23 doi:10.1002/14651858.CD007988.pub2  
35  
36 24 27. Koehler F, Koehler K, Deckwart O, Prescher S, Wegscheider K, Kirwan  
37 25 B-A, et al. Efficacy of telemedical interventional management in patients  
38 26 with heart failure (TIM-HF2): a randomised, controlled, parallel-group,  
39 27 unmasked trial. Lancet. 2018;392: 1047–1057. doi:10.1016/S0140-  
40 28 6736(18)31880-4  
41  
42  
43 29 28. Hesselink G, Schoonhoven L, Barach P, Spijker A, Gademan P, Kalkman  
44 30 C, et al. Improving patient handovers from hospital to primary care: a  
45 31 systematic review. Ann Intern Med. 2012;157: 417–428.  
46 32 doi:10.7326/0003-4819-157-6-201209180-00006  
47  
48 33 29. Braet A, Weltens C, Sermeus W. Effectiveness of discharge interventions  
49 34 from hospital to home on hospital readmissions: a systematic review. JBI  
50 35 Database System Rev Implement Rep. 2016;14: 106–173.  
51 36 doi:10.11124/jbisrir-2016-2381  
52  
53  
54 37  
55  
56 38  
57  
58  
59  
60



**STROBE 2007 (v4) Statement—Checklist of items that should be included in reports of *cross-sectional studies***

| Section/Topic                | Item # | Recommendation                                                                                                                                                                       | Reported on page # |
|------------------------------|--------|--------------------------------------------------------------------------------------------------------------------------------------------------------------------------------------|--------------------|
| <b>Title and abstract</b>    | 1      | (a) Indicate the study's design with a commonly used term in the title or the abstract                                                                                               | 1                  |
|                              |        | (b) Provide in the abstract an informative and balanced summary of what was done and what was found                                                                                  | 2                  |
| <b>Introduction</b>          |        |                                                                                                                                                                                      |                    |
| Background/rationale         | 2      | Explain the scientific background and rationale for the investigation being reported                                                                                                 | 6                  |
| Objectives                   | 3      | State specific objectives, including any prespecified hypotheses                                                                                                                     | 6                  |
| <b>Methods</b>               |        |                                                                                                                                                                                      |                    |
| Study design                 | 4      | Present key elements of study design early in the paper                                                                                                                              | 8                  |
| Setting                      | 5      | Describe the setting, locations, and relevant dates, including periods of recruitment, exposure, follow-up, and data collection                                                      | 9                  |
| Participants                 | 6      | (a) Give the eligibility criteria, and the sources and methods of selection of participants                                                                                          | 8                  |
| Variables                    | 7      | Clearly define all outcomes, exposures, predictors, potential confounders, and effect modifiers. Give diagnostic criteria, if applicable                                             | 9                  |
| Data sources/<br>measurement | 8*     | For each variable of interest, give sources of data and details of methods of assessment (measurement). Describe comparability of assessment methods if there is more than one group | 9                  |
| Bias                         | 9      | Describe any efforts to address potential sources of bias                                                                                                                            | 10                 |
| Study size                   | 10     | Explain how the study size was arrived at                                                                                                                                            | 10                 |
| Quantitative variables       | 11     | Explain how quantitative variables were handled in the analyses. If applicable, describe which groupings were chosen and why                                                         | 10                 |
| Statistical methods          | 12     | (a) Describe all statistical methods, including those used to control for confounding                                                                                                | 10                 |
|                              |        | (b) Describe any methods used to examine subgroups and interactions                                                                                                                  | 10                 |
|                              |        | (c) Explain how missing data were addressed                                                                                                                                          | n/a                |
|                              |        | (d) If applicable, describe analytical methods taking account of sampling strategy                                                                                                   | n/a                |
|                              |        | (e) Describe any sensitivity analyses                                                                                                                                                | 10                 |
| <b>Results</b>               |        |                                                                                                                                                                                      |                    |



|                          |     |                                                                                                                                                                                                              |     |
|--------------------------|-----|--------------------------------------------------------------------------------------------------------------------------------------------------------------------------------------------------------------|-----|
| Participants             | 13* | (a) Report numbers of individuals at each stage of study—eg numbers potentially eligible, examined for eligibility, confirmed eligible, included in the study, completing follow-up, and analysed            | 11  |
|                          |     | (b) Give reasons for non-participation at each stage                                                                                                                                                         | n/a |
|                          |     | (c) Consider use of a flow diagram                                                                                                                                                                           | n/a |
| Descriptive data         | 14* | (a) Give characteristics of study participants (eg demographic, clinical, social) and information on exposures and potential confounders                                                                     | 11  |
|                          |     | (b) Indicate number of participants with missing data for each variable of interest                                                                                                                          | n/a |
| Outcome data             | 15* | Report numbers of outcome events or summary measures                                                                                                                                                         | 12  |
| Main results             | 16  | (a) Give unadjusted estimates and, if applicable, confounder-adjusted estimates and their precision (eg, 95% confidence interval). Make clear which confounders were adjusted for and why they were included | 12  |
|                          |     | (b) Report category boundaries when continuous variables were categorized                                                                                                                                    | n/a |
|                          |     | (c) If relevant, consider translating estimates of relative risk into absolute risk for a meaningful time period                                                                                             | n/a |
| Other analyses           | 17  | Report other analyses done—eg analyses of subgroups and interactions, and sensitivity analyses                                                                                                               | 12  |
| <b>Discussion</b>        |     |                                                                                                                                                                                                              |     |
| Key results              | 18  | Summarise key results with reference to study objectives                                                                                                                                                     | 13  |
| Limitations              | 19  | Discuss limitations of the study, taking into account sources of potential bias or imprecision. Discuss both direction and magnitude of any potential bias                                                   | 15  |
| Interpretation           | 20  | Give a cautious overall interpretation of results considering objectives, limitations, multiplicity of analyses, results from similar studies, and other relevant evidence                                   | 16  |
| Generalisability         | 21  | Discuss the generalisability (external validity) of the study results                                                                                                                                        | 15  |
| <b>Other information</b> |     |                                                                                                                                                                                                              |     |
| Funding                  | 22  | Give the source of funding and the role of the funders for the present study and, if applicable, for the original study on which the present article is based                                                | 17  |

\*Give information separately for cases and controls in case-control studies and, if applicable, for exposed and unexposed groups in cohort and cross-sectional studies.

**Note:** An Explanation and Elaboration article discusses each checklist item and gives methodological background and published examples of transparent reporting. The STROBE checklist is best used in conjunction with this article (freely available on the Web sites of PLoS Medicine at <http://www.plosmedicine.org/>, Annals of Internal Medicine at <http://www.annals.org/>, and Epidemiology at <http://www.epidem.com/>). Information on the STROBE Initiative is available at [www.strobe-statement.org](http://www.strobe-statement.org).

# BMJ Open

## Effect of involving certified health care assistants in primary care in Germany: A cross-sectional study

|                                 |                                                                                                                                                                                                                                                                                                                                                                                                                                                                                                                                                                |
|---------------------------------|----------------------------------------------------------------------------------------------------------------------------------------------------------------------------------------------------------------------------------------------------------------------------------------------------------------------------------------------------------------------------------------------------------------------------------------------------------------------------------------------------------------------------------------------------------------|
| Journal:                        | <i>BMJ Open</i>                                                                                                                                                                                                                                                                                                                                                                                                                                                                                                                                                |
| Manuscript ID                   | bmjopen-2019-033325.R3                                                                                                                                                                                                                                                                                                                                                                                                                                                                                                                                         |
| Article Type:                   | Original research                                                                                                                                                                                                                                                                                                                                                                                                                                                                                                                                              |
| Date Submitted by the Author:   | 23-Nov-2019                                                                                                                                                                                                                                                                                                                                                                                                                                                                                                                                                    |
| Complete List of Authors:       | Senft, Jonas; University Hospital Heidelberg, Department of General Practice and Health Services Research;<br>Wensing , M; University Hospital Heidelberg, Department of General Practice and Health Services Research<br>Poss-Doering, Regina; University Hospital Heidelberg, Department of General Practice and Health Services Research<br>Szecsenyi, Joachim; University Hospital Heidelberg, Department of General Practice and Health Services Research<br>Laux, Gunter; UniversitatsKlinikum Heidelberg, General Practice and Health Services Research |
| <b>Primary Subject Heading</b>: | Geriatric medicine                                                                                                                                                                                                                                                                                                                                                                                                                                                                                                                                             |
| Secondary Subject Heading:      | Health services research, Medical education and training, General practice / Family practice                                                                                                                                                                                                                                                                                                                                                                                                                                                                   |
| Keywords:                       | GENERAL MEDICINE (see Internal Medicine), HEALTH SERVICES ADMINISTRATION & MANAGEMENT, HEALTH ECONOMICS                                                                                                                                                                                                                                                                                                                                                                                                                                                        |
|                                 |                                                                                                                                                                                                                                                                                                                                                                                                                                                                                                                                                                |

SCHOLARONE™  
Manuscripts

1  
2  
3 **1 Effect of involving certified health care assistants in primary**  
4 **2 care in Germany: A cross-sectional study**

5  
6  
7  
8 3 Short title: Effect of involving certified health care assistants in primary care in  
9  
10 4 Germany

11  
12  
13 5 Jonas D. Senft<sup>1</sup>, Michel Wensing<sup>1</sup>, Regina Poss-Doering<sup>1</sup>, Joachim Szecsenyi<sup>1</sup>,  
14  
15  
16 6 Gunter Laux<sup>1</sup>

17  
18  
19  
20 8 <sup>1</sup>Department of General Practice and Health Services Research, University  
21  
22  
23 9 Hospital Heidelberg, Im Neuenheimer Feld 130.3, 69120 Heidelberg, Germany

24  
25  
26  
27 11 Funding: This study was funded by institutional means of the University of  
28  
29  
30 12 Heidelberg.

31  
32  
33  
34 14 Corresponding author information:

35 15 Jonas D. Senft, MD

36 16 Department of General Practice and Health Services Research

37 17 University Hospital Heidelberg

38 18 Im Neuenheimer Feld 130.3

39 19 69120 Heidelberg, Germany

40 20 Tel+49(0)6221-56-4743

41 21 Fax +49 (0)6221-56-1972

42 22 E-Mail: [jonas.senft@med.uni-heidelberg.de](mailto:jonas.senft@med.uni-heidelberg.de)

43  
44  
45  
46  
47  
48  
49  
50  
51  
52  
53  
54  
55  
56  
57  
58  
59  
60

1  
2  
3 **1 Abstract**  
4

5 **2 Objectives:** Growing prevalence of chronic diseases and limited resources are  
6  
7 key challenges for future health care. As a promising approach to maintain high-  
8  
9 quality primary care, non-physician health care professionals have been trained  
10  
11 to broaden qualifications and responsibilities. This study aimed to assess the  
12  
13 influence of involving certified health care assistants (HCAs, German: VERAH)  
14  
15 on quality and efficacy of primary care in Germany.  
16  
17

18  
19 **8 Design:** Cross-sectional study  
20

21  
22 **9 Setting:** Primary care  
23

24 **10 Participants:** Patients insured by the AOK statutory health insurer (Allgemeine  
25  
26 Ortskrankenkasse, Baden-Wuerttemberg, Germany).  
27

28 **12 Interventions:** Since 2008 practice assistants in Germany can enhance their  
29  
30 professional education to become certified HCAs.  
31

32  
33 **14 Primary and secondary outcome measures:** Claims data related to patients  
34  
35 treated in practices employing at least one HCA were compared to data from  
36  
37 practices not employing HCAs to determine frequency of consultations, hospital  
38  
39 admissions and readmissions. Economic analysis comprised hospitalization  
40  
41 costs, prescriptions of follow-on drugs and outpatient medication costs.  
42  
43

44 **19 Results:** A total of 397,493 patients were treated in HCA practices, 463,730  
45  
46 patients attended to non-HCA practices. Patients in HCA practices had an 8.2%  
47  
48 lower rate of specialist consultations ( $p<0.0001$ ), a 4.0% lower rate of  
49  
50 hospitalizations ( $p<0.0001$ ), a 3.5% lower rate of readmissions ( $p=0.0463$ ), a  
51  
52 14.2% lower rate of follow-on drug prescriptions ( $p<0.0001$ ) and 4.7% lower  
53  
54 costs of total medication ( $p<0.0001$ ). No difference was found regarding the  
55  
56 consultation rate of general practitioners and hospital costs.  
57  
58  
59  
60

1  
2  
3 1 **Conclusions:** For the first time this high-volume claims data analysis showed  
4  
5 2 that involving HCAs in primary care in Germany is associated with a reduction  
6  
7 3 in hospital admissions, specialist consultations and medication costs.  
8  
9  
10 4 Consequently, broadening qualifications may be a successful strategy not only  
11  
12 5 to share physicians' work load but to improve quality and efficacy in primary  
13  
14 6 care to meet future challenges. Future studies may explore specific tasks to be  
15  
16  
17 7 shared with non-physician workforces and standardization of the professional  
18  
19 8 role.  
20  
21  
22  
23  
24  
25  
26  
27  
28  
29  
30  
31  
32  
33  
34  
35  
36  
37  
38  
39  
40  
41  
42  
43  
44  
45  
46  
47  
48  
49  
50  
51  
52  
53  
54  
55  
56  
57  
58  
59  
60

## 1 **Strengths and limitations of this study**

- 2 • This is the first high-volume claims data analysis assessing the effect of  
3 involving higher qualified practice assistants on quality and efficacy health  
4 care indicators in Germany.
- 5 • The analysis is performed on a comprehensive sample of data of one year  
6 covering 861,223 patients.
- 7 • Statistical adjustment was possible for relevant patient-sided factors like  
8 patients' age and morbidity, nursing care level and structural factors like  
9 practice size, urbanization and type (single or group practice).
- 10 • Due to the limitations given by the nature of claims data, further potentially  
11 relevant factors like educational level and experience of the staff were not  
12 available for this analysis.
- 13 • The professional role of HCAs in Germany is not standardized, thus  
14 limitations are given to the transferability of the intervention.

1  
2  
3 **1 Abbreviations:**  
4

5  
6 2 AOK statutory health insurance provider (German: Allgemeine  
7  
8 3 Ortskrankenkasse)  
9  
10 4 GP general practitioner  
11  
12 5 HCA health care assistant  
13  
14 6 HZV GP-centered care (German: Hausarztzentrierte Versorgung)  
15  
16 7 PZN central pharmaceutical number (Pharmazentralnummer)  
17  
18  
19  
20  
21  
22  
23  
24  
25  
26  
27  
28  
29  
30  
31  
32  
33  
34  
35  
36  
37  
38  
39  
40  
41  
42  
43  
44  
45  
46  
47  
48  
49  
50  
51  
52  
53  
54  
55  
56  
57  
58  
59  
60

For peer review only

## 1 Introduction

2 All over the globe, providing access to high-quality primary care is a challenge  
3 for health care systems. In the view of growing prevalence of chronic diseases  
4 and limited health care resources, physicians are confronted with increasing  
5 numbers of consultations while time is very limited [1,2].

6 Particularly in times of evidence-based practice and growing use of treatment  
7 algorithms, time is needed to meet patient's individual preferences or  
8 circumstances, which are deciding factors for treatment success [3,4].

9 Consequently, strategies are needed to maintain access to high-quality general  
10 practice. As a promising worldwide approach, highly qualified non-physician  
11 health care professionals such as practice nurses in the U.S. or in Australia are  
12 trained to take a more active role in primary care, particularly in treatment of  
13 patients with chronic diseases [5–8]. For primary healthcare registered nurses  
14 and nurse practitioners in Canada, there is growing evidence that their  
15 involvement in practices is associated with health promotion, particularly in the  
16 management of chronic diseases [9–11].

17 While qualified nurses are well integrated in primary care in other countries, in  
18 Germany so far there is no professional role for nurses in general medicine. On  
19 the other hand, non-academic workforces like practice or medical assistants  
20 have become increasingly involved into active patient care as they have been  
21 integrated into treatment monitoring or patient coaching for chronic diseases  
22 like diabetes e.g. in the United States [8,12,13]. In Germany, general  
23 practitioners (GP) usually employ certified practice assistants, who absolved  
24 professional training for three years and traditionally performed clerical duties  
25 like reception and routine tasks, such as blood sampling or electrocardiogram



1 recording. Since 2008 practical assistants may undergo an additional training  
2 program of 200 hours to become certified as a so-called health care assistant  
3 (German: "Versorgungsassistent/in in der Hausarztpraxis", VERAH). Health  
4 care assistants (HCAs) are qualified to be closer involved in primary care  
5 delivery performing tasks such as team-based case management and  
6 monitoring of chronically-ill patients, routine home visits, and wound care [7].  
7 However, to date there is only limited knowledge about the effect of broadening  
8 skills and responsibilities of non-physician workforces on quality and efficacy of  
9 primary care. Recent RCTs did not find a beneficial effect of disease  
10 management programs led by non-physician work forces on care indicators like  
11 hospitalization rate or health care costs [14–16]. A recent meta-analysis of 18  
12 RCTs assessing the influence of nurses working as a substitute for physicians  
13 showed that nurse-led care may be equal in terms of health outcomes like  
14 control of diabetes and blood pressure and patient satisfaction [17].  
15 However, no evidence-based conclusion can be drawn currently with regard to  
16 the influence of involving higher qualified non-physician workforce on health  
17 care efficacy indicators like hospitalization rate, specialist consultations and  
18 costs. Furthermore, common sample sizes of available RCTs may be  
19 underpowered to capture effects in this regard. The aim of this study was to  
20 assess the influence of involving certified health care assistants on quality and  
21 efficacy of primary care in Germany. For this purpose, for the first time a high-  
22 volume claims data cross-sectional study was performed.

## 1 **Methods**

### 2 Study Design

3 A cross-sectional study was conducted. Claims data related to patients treated  
4 in general practices between January 1 and December 31, 2014 were supplied  
5 by the AOK statutory health insurance company (German: "Allgemeine  
6 Ortskrankenkasse", Baden-Wuerttemberg, Germany). Data of patients treated  
7 in practices employing at least one certified HCA were compared to data from  
8 practices not employing HCAs (non-HCA) to assess the influence of involving  
9 HCAs in primary care delivery. Ethical approval for this study was given by the  
10 local institutional Ethics Committee of the University Hospital Heidelberg (No.  
11 S-359/2013).

### 12 Study population

13 Secondary data related to patients insured by the AOK statutory health  
14 insurance company of Baden-Wuerttemberg, Germany, and participating in a  
15 specific primary care program in Germany (GP-centred care; German:  
16 "Hausarztzentrierte Versorgung" (HZV)) were eligible for data analysis. The  
17 federal state of Baden-Wuerttemberg has a population of about 10.7 million and  
18 AOK is the largest statutory health insurer with about 4 million insured persons.  
19 The HZV program is a large-scale, legally stipulated care concept encouraging  
20 patients to enroll with a general practitioner (GP), aiming to strengthen primary  
21 care and to enhance health care for patients with chronic diseases and complex  
22 health care needs [18]. Secondary patient data were included in the analysis, if  
23 patients met the following criteria: aged 18 years or older, living in Baden-  
24 Wuerttemberg, at least one visit to the primary care physician in the relevant

1  
2  
3 1 year, no registration with other primary care contracts (e.g., integrated care  
4  
5 2 contracts), no interruptions of registration to HZV program in the relevant year.

### 6 7 8 3 Intervention

9  
10 4 Since 2008, practice assistants working in practices participating in the HZV  
11  
12 5 program in Germany, can enhance their professional education by attending a  
13  
14 6 standardized curriculum of 200 teaching units of theoretical and practical  
15  
16 7 lessons. Upon mandatory examination, these practice assistants become state-  
17  
18 8 certified as HCA (German: VERAH) [7]. Besides routine tasks like blood  
19  
20 9 sampling, electrocardiogram recording or spirometry, HCAs are thought to  
21  
22 10 perform monitoring of chronically-ill patients, prevention measures, routine  
23  
24 11 home visits and wound care management.

### 25 26 27 28 12 Data acquisition and outcome parameters

29  
30 13 Secondary patient data were recorded by the AOK state health insurance  
31  
32 14 company for reimbursement purposes and continuous evaluation of the HZV  
33  
34 15 program. For the analysis, data were supplied by the AOK to the Department  
35  
36 16 of General Practice and Health Services Research, University Hospital  
37  
38 17 Heidelberg. Practices employing certified HCAs could be unambiguously  
39  
40 18 identified since employment of HCAs is obligatorily reimbursed by state health  
41  
42 19 insurance in the HZV program. The claims data consisted of several data sets,  
43  
44 20 containing particular information on patient care (e. g. GP consultations,  
45  
46 21 prescriptions and hospitalizations). These data could be linked on the basis of  
47  
48 22 a unique patient identifier. Data linkage was performed by our research team  
49  
50 23 using a relational database. Subjects cannot be identified, directly or through  
51  
52 24 identifiers linked to the subjects. Data storage and extraction were performed  
53  
54 25 with MySQL Community Server x64 (Oracle Corporation, Redwood Shores,  
55  
56  
57  
58  
59  
60

1 CA, USA). All national and institutional guidelines concerning data acquisition  
2 for retrospective analyses were followed at all times.

3 The obtained data set comprised age, gender, diagnoses according to ICD-10  
4 coding as well as accounting data on consultations, prescribed medication and  
5 hospital stays.

6 To assess the effect of involving HCAs on quality and efficacy of primary care,  
7 the following outcome parameters were analyzed: GP consultations, specialist  
8 consultations, hospital admissions, hospital readmissions within 4 weeks,  
9 hospitalization costs, prescription of follow-on drugs and outpatient medication  
10 costs. The number of GP and specialist consultations per patient could be  
11 determined by the codes according to the EBM system (“Einheitlicher  
12 Bewertungsmaßstab”) used for accounting of outpatient medical services in  
13 Germany. Number of hospital admissions and readmissions per patient as well  
14 as per-patient costs for hospitalization in € was determined by the recorded  
15 Diagnosis Related Groups (DRG) codes used for reimbursement of inpatient  
16 medical services in Germany. The per-patient number of prescriptions of so-  
17 called follow-on drugs, patent-secured marginally altered pharmaceuticals with  
18 no benefit compared to the prototype drug according to evidence-based criteria  
19 [19], was determined by records of the central pharmaceutical numbers of  
20 prescribed medications (“Pharmazentralnummer”, PZN). Outpatient medication  
21 costs per patient in € could be determined by accounting data for prescriptions  
22 reimbursed by the AOK state health insurance.

### 23 Statistical analysis

24 The full sample of available claims data was used for the analysis. In order to  
25 calculate frequencies, rates and percentages, we used SAS PROC SQL. In

1 order to assess the adjusted outcomes of interest, we used SAS PROC  
2 GENMOD (SAS V.9.4×64, SAS Institute). There was no missing data within the  
3 underlying data set. If there was no utilization for a particular patient, e.g. no  
4 hospitalization, this was denoted as “0”. The following factors were selected ex  
5 ante for the adjustment of the comparison between groups: patient age, sex,  
6 morbidity according to Charlson Index [20], nursing home as residence, nursing  
7 care level (legally defined 4-point scale to assess need for nursing support),  
8 urbanization (rural, urban), practice size (number of contacts in relevant  
9 period), type of practice (single, group). Comparison between groups was done  
10 by multivariable regression analysis, which the three-level clustering of  
11 patients, GPs and practices into account. Depending on the distribution of each  
12 outcome, linear regression, negative-binomial regression or Poisson  
13 regression models (for count data) were used. Since multiple hypotheses were  
14 tested in this analysis, the Bonferroni correction was used to compensate for  
15 multiple comparisons. For all analyses, results were considered statistically  
16 significant, if the p value was 0.05 or less.

#### 17 Patient and public involvement

18 Exploring strategies to provide and maintain access to high-quality primary care  
19 is of public interest, particularly in the view of growing prevalence of chronic  
20 diseases and limited health care resources. Due to the retrospective study  
21 design based on an analysis of pseudonymized data, patients could not be  
22 identified, nor be informed or involved into this study. The public dissemination  
23 of the results is intended to be achieved by scientific publication.

## 1 Results

2 861,223 patients were evaluated in the observation period from January 1 to  
 3 December 31, 2014. 397.493 patients were treated in practices involving at  
 4 least one HCA to primary care (HCA group), 463.730 patients were seen in  
 5 practices, which did not employ HCAs (non-HCA group). Patients  
 6 characteristics are shown in Table 1.

Table 1: Patient characteristics: Data of patients treated in practices employing  
 at least one HCA compared to practices not employing HCAs (non-HCA)

|                    | HCA            | Non-HCA        | p       |
|--------------------|----------------|----------------|---------|
| Number of patients | 397493         | 463730         |         |
| Male (N, %)        | 174415 (43.9%) | 200775 (43.2%) | <0.0001 |
| Age                | 56.9 ± 18.5    | 58.4 ± 18.1    | <0.0001 |
| Charlson Index     | 1.37 ± 2.0     | 1.38 ± 1.98    | <0.0001 |
| Care level [N]     |                |                | <0.0001 |
| No care:           | 378919         | 442024         |         |
| I:                 | 11186          | 13165          |         |
| II:                | 5771           | 6765           |         |
| III:               | 1593           | 1751           |         |
| IV:                | 24             | 25             |         |

Continuous values are presented as mean ± standard deviation; HCA: health care assistant;

7 According to the adjusted analysis, patients in the HCA-group had an 8.2%  
 8 lower rate of specialist consultations (p<0.0001). Per-patient number of hospital  
 9 admissions was 4.0% lower (p<0.0001) and number of hospital readmissions  
 10 was 3.5% lower in the HCA group (p=0.0463). Prescriptions of follow-on drugs  
 11 were 14.2% lower and total outpatient medication costs were 4.69% lower in  
 12 the HCA-group respectively (p<0.0001). No difference was found regarding the  
 13 number of GP consultations and hospitalization costs (Table 2).

Table 2: Outcomes: Outcome parameters for patients treated in practices employing at least one HCA compared to practices not employing HCAs (non-HCA)

| Per-patient outcome             | Unadjusted Outcome |               | Adjusted Difference (AD) HCA vs. non-HCA |         |         |
|---------------------------------|--------------------|---------------|------------------------------------------|---------|---------|
|                                 | HCA                | Non-HCA       | AD [95%CI]                               | AD in % | p       |
| GP consultations                | 13.46 ± 11.42      | 13.72 ± 11.81 | -0.063 ± 0.021 [-0.105, -0.022]          | -0.21%  | 0.0028  |
| Specialist consultations        | 4.59 ± 8.23        | 4.89 ± 8.38   | -0.209 ± 0.018 [-0.245, 0.173]           | -8.21%  | <0.0001 |
| Hospital admissions             | 0.272 ± 0.762      | 0.286 ± 0.790 | -0.013 ± 0.008 [-0.057, -0.025]          | -4.00%  | <0.0001 |
| Hospital readmissions           | 0.210 ± 0.682      | 0.216 ± 0.721 | -0.036 ± 0.018 [-0.071, -0.006]          | -3.53%  | 0.0463  |
| Hospitalization costs [€]       | 6,239 ± 9,388      | 6319 ± 9278   | -40.42 ± 0.005 [-0.018, 0.003]           | 0.73%   | 0.1711  |
| Prescription of follow-on drugs | 3.12 ± 10.15       | 3.57 ± 10.89  | -0.388 ± 0.026 [-0.437, -0.334]          | -14.2%  | <0.0001 |
| Outpatient medication costs [€] | 1,333 ± 59,877     | 1376 ± 51567  | -71.01 ± 0.011 [-0.070, -0.026]          | 4.69%   | <0.0001 |

Values are presented as mean ± standard deviation; AD: adjusted difference; GP: general practitioner;

HCA: health care assistant; CI: confidence interval

## 1 Discussion

2 For the first time, this cross-sectional study assessed high-volume claims data  
3 to evaluate the influence of involving HCAs on quality and efficacy of primary  
4 care in Germany. The analysis of care-related data of 861,223 patients showed  
5 a lower rate of hospital admissions, specialist consultations as well as lower  
6 outpatient medication costs when HCAs were part of the practice staff.  
7 Although the measured effect is low-scaled, it is of high relevance for the  
8 development of future primary care concepts. From a patient-centered view,  
9 avoiding hospitalization or unnecessary medication may help to reduce  
10 patients' burden and morbidity due to hospital stay or pharmacological side-  
11 effects. On the other hand, avoidable treatment will be not only a central  
12 determinant of quality, but a key cost factor for health care systems, which will  
13 be challenged by the rising prevalence of chronic diseases in the future.

14 The measured effect may be hypothesized to be due to an improved patient  
15 access to primary care. Either directly by being attended to by an HCA, or  
16 indirectly by improvement of workflow, patients may benefit from a higher  
17 quality and efficacy of care. Hospitalizations and specialist consultations may  
18 be avoided by a more intensive outpatient care facilitated by HCA involvement.  
19 Particularly, patients with chronic diseases may benefit from extended services  
20 like intense monitoring, education and reminders [21]. And eventually, costs for  
21 prescriptions may be reduced by efficient management of medication regimen.

22 To date, knowledge about potential effects of involving higher qualified non-  
23 physician healthcare professionals in primary care is low. Several RCTs  
24 evaluating disease management programs for chronic conditions like chronic  
25 pulmonary disease or heart failure involved practice assistants with enhanced



1  
2  
3 1 educational training and responsibilities, however, did not prove an effect of  
4  
5 2 these programs on relevant care indicators [6,15,22]. A potential reason for  
6  
7 3 this contrast to our findings may be an underpowered sample-size postulating  
8  
9 4 a reduction of avoidable hospitalizations up to 20%. The results of our study  
10  
11 5 show a much smaller effect with a reduction of 4% hospitalizations when HCAs  
12  
13 6 were involved, which in our opinion is closer to reality in primary care. As a  
14  
15 7 comparison, even in settings of complex disease management programs for  
16  
17 8 heart failure patients, low rates of reduction in all-cause hospitalization are  
18  
19 9 common when involving academically educated non-physician work forces and  
20  
21 10 specialist physicians, with a range of up to 8% as a recent meta-analysis of 12  
22  
23 11 RCTs showed [23].

24  
25  
26  
27  
28 12 Another relevant finding of this study is that the rate of GP consultations was  
29  
30 13 only slightly reduced by 0.21% when HCAs were involved. This is noteworthy,  
31  
32 14 since a distinct reduction of GP consultations might have been expected  
33  
34 15 assuming that HCAs perform chosen routine tasks independently. One the  
35  
36 16 other hand, this result may reflect that involvement of HCAs is not implemented  
37  
38 17 as a one-way delegation or as a substitution for physician care as has been  
39  
40 18 proposed for nurse-led care concepts [17], but more as a team interaction.  
41  
42 19 However, no conclusion can be drawn by this study with regard to the specific  
43  
44 20 role of HCAs within the practice staff. As a recent survey showed, in Germany  
45  
46 21 there is no firmly standardized professional role for HCAs. Performed tasks  
47  
48 22 differ widely from simple patient assessment or basic wound care to tasks with  
49  
50 23 substantial responsibility like emergency home visits, chronic care  
51  
52 24 management or treatment of complex wounds [7]. Eventually, the GP decides  
53  
54 25 which tasks are performed by HCAs and to what extent they perform them  
55  
56  
57  
58  
59  
60

1 independently. While this approach meets individual eligibility, more  
2 standardization may be favourable to identify tasks to be shared in teams  
3 according to their effect on care quality and efficacy. Furthermore, it could help  
4 to reveal potential limitations, as found in nurse-led self-management programs  
5 of COPD, which have been associated with higher airway-related mortality  
6 [15,24]. A promising approach for a standardized involvement of HCAs certainly  
7 lies in chronic disease management programs, which proved to be efficient for  
8 heart failure or asthma bronchiale [23,25,26]. Furthermore, patient monitoring  
9 by HCAs could be supported using new IT-based methods such as web-based  
10 telemedical care, which has been shown to prevent hospital admissions and  
11 reduce all-cause mortality in heart failure patients [27]. Finally, involving HCAs  
12 in standardized translational approaches after hospital release may be  
13 promising to reduce readmission rates [28,29].

14 Limitations are given by the study design and the associated risk of confounding  
15 factors. Due to the nature of claims data, the parameters available for analysis  
16 were limited. The omission of practice details was an important element of the  
17 data protection contract for participating practices with the objective not to be  
18 identifiable by researchers. Thus, further potentially relevant factors such as  
19 educational level and experience of the staff or structural characteristics of the  
20 practices like equipment or procedural factors such as available diagnostics  
21 and treatment options, were not available for this analysis. Furthermore, the  
22 evaluation of relevant patient-reported outcomes such as quality of life was not  
23 possible in this analysis. On the other hand, we deliberately chose claims data  
24 for this analysis due to the high volume and statistical power necessary to  
25 assess the chosen outcomes. Furthermore, in our opinion the available

1 structural factors included in this analysis represent an appropriate and best  
2 possible adjustment for the measured outcomes.  
3 This high-volume cross-sectional study showed that involving HCAs in primary  
4 care in Germany is associated with a reduction in hospital admissions,  
5 specialist consultations and overall medication costs. Consequently,  
6 broadening qualifications and responsibilities of non-physician work forces may  
7 be a successful strategy not only to alleviate physicians' workload, but to  
8 improve quality and efficacy of primary care to meet future health care  
9 challenges. Further studies should explore specific tasks to be shared with non-  
10 physician workforces and standardization of the professional role.

## **Acknowledgements**

1 We would like to thank the statutory health insurance provider AOK Baden-  
2 Wuerttemberg (Germany) for providing pseudonymized data for this analysis.

## **Contributors**

3 Jonas D. Senft: design and methods, writing the article; Regina Poss-Doering:  
4 data interpretation, revision of the article; Michel Wensing: data interpretation,  
5 revision of the article; Joachim Szecsenyi: design and methods, revision of the  
6 article; Gunter Laux: design and methods, statistical analysis, revision of the  
7 article. All authors commented on the draft and approved the final version of  
8 the manuscript.

## **Competing interests**

9 The authors Jonas D. Senft, Regina Poss-Doering, Michel Wensing, Joachim  
10 Szecsenyi and Gunter Laux have no competing interests or financial ties to  
11 declare. Data was supplied by the statutory health insurance AOK Baden-  
12 Wuerttemberg, which had no role in analysis, interpretation, or publication of  
13 the data.

## **Funding**

14 The authors have not declared a specific grant for this research from any  
15 funding agency in the public, commercial or not-for-profit sectors.

## **Data sharing statement**

16 Data used in this analysis are not in the public domain and use is covered by  
17 data sharing agreements with the AOK Baden-Wuerttemberg.

**References:**

1. Wolff JL, Starfield B, Anderson G. Prevalence, expenditures, and complications of multiple chronic conditions in the elderly. *Arch Intern Med.* 2002;162: 2269–2276. doi:10.1001/archinte.162.20.2269
2. Fried TR, Tinetti ME, Iannone L. Primary care clinicians' experiences with treatment decision making for older persons with multiple conditions. *Arch Intern Med.* 2011;171: 75–80. doi:10.1001/archinternmed.2010.318
3. Zolnieriek KBH, Dimatteo MR. Physician communication and patient adherence to treatment: a meta-analysis. *Med Care.* 2009;47: 826–834. doi:10.1097/MLR.0b013e31819a5acc
4. Kelley JM, Kraft-Todd G, Schapira L, Kossowsky J, Riess H. The influence of the patient-clinician relationship on healthcare outcomes: a systematic review and meta-analysis of randomized controlled trials. *PLoS ONE.* 2014;9: e94207. doi:10.1371/journal.pone.0094207
5. Ghorob A, Bodenheimer T. Sharing the care to improve access to primary care. *N Engl J Med.* 2012;366: 1955–1957. doi:10.1056/NEJMp1202775
6. Freund T, Peters-Klimm F, Boyd CM, Mahler C, Gensichen J, Erler A, et al. Medical Assistant-Based Care Management for High-Risk Patients in Small Primary Care Practices: A Cluster Randomized Clinical Trial. *Ann Intern Med.* 2016;164: 323–330. doi:10.7326/M14-2403
7. Mergenthal K, Beyer M, Gerlach FM, Guethlin C. Sharing Responsibilities within the General Practice Team - A Cross-Sectional Study of Task Delegation in Germany. *PLoS ONE.* 2016;11: e0157248. doi:10.1371/journal.pone.0157248
8. Freund T, Everett C, Griffiths P, Hudon C, Naccarella L, Laurant M. Skill mix, roles and remuneration in the primary care workforce: who are the healthcare professionals in the primary care teams across the world? *Int J Nurs Stud.* 2015;52: 727–743. doi:10.1016/j.ijnurstu.2014.11.014
9. Donald F, Martin-Misener R, Bryant-Lukosius D, Kilpatrick K, Kaasalainen S, Carter N, et al. The primary healthcare nurse practitioner role in Canada. *Nurs Leadersh (Tor Ont).* 2010;23 Spec No 2010: 88–113.
10. Lukewich J, Edge DS, VanDenKerkhof E, Williamson T, Tranmer J. Association between registered nurse staffing and management outcomes of patients with type 2 diabetes within primary care: a cross-sectional linkage study. *CMAJ Open.* 2016;4: E264-270. doi:10.9778/cmajo.20150113
11. Russell GM, Dahrouge S, Hogg W, Geneau R, Muldoon L, Tuna M. Managing chronic disease in ontario primary care: the impact of

- 1  
2  
3 1 organizational factors. *Ann Fam Med*. 2009;7: 309–318.  
4 2 doi:10.1370/afm.982  
5  
6 3 12. Halter M, Drennan V, Chattopadhyay K, Carneiro W, Yiallourous J, de  
7 4 Lusignan S, et al. The contribution of physician assistants in primary care:  
8 5 a systematic review. *BMC Health Serv Res*. 2013;13: 223.  
9 6 doi:10.1186/1472-6963-13-223  
10  
11 7 13. Ruggiero L, Riley BB, Hernandez R, Quinn LT, Gerber BS, Castillo A, et  
12 8 al. Medical assistant coaching to support diabetes self-care among low-  
13 9 income racial/ethnic minority populations: randomized controlled trial.  
14 10 *West J Nurs Res*. 2014;36: 1052–1073. doi:10.1177/0193945914522862  
15  
16 11 14. Bekelman DB, Plomondon ME, Carey EP, Sullivan MD, Nelson KM,  
17 12 Hattler B, et al. Primary Results of the Patient-Centered Disease  
18 13 Management (PCDM) for Heart Failure Study: A Randomized Clinical  
19 14 Trial. *JAMA Intern Med*. 2015;175: 725–732.  
20 15 doi:10.1001/jamainternmed.2015.0315  
21  
22 16 15. Fan VS, Gaziano JM, Lew R, Bourbeau J, Adams SG, Leatherman S, et  
23 17 al. A comprehensive care management program to prevent chronic  
24 18 obstructive pulmonary disease hospitalizations: a randomized, controlled  
25 19 trial. *Ann Intern Med*. 2012;156: 673–683. doi:10.7326/0003-4819-156-10-  
26 20 201205150-00003  
27  
28 21 16. Connor KI, Cheng EM, Barry F, Siebens HC, Lee ML, Ganz DA, et al.  
29 22 Randomized trial of care management to improve Parkinson disease care  
30 23 quality. *Neurology*. 2019;92: e1831–e1842.  
31 24 doi:10.1212/WNL.0000000000007324  
32  
33 25 17. Laurant M, van der Biezen M, Wijers N, Watananirun K, Kontopantelis E,  
34 26 van Vught AJ. Nurses as substitutes for doctors in primary care. *Cochrane*  
35 27 *Database Syst Rev*. 2018;7: CD001271.  
36 28 doi:10.1002/14651858.CD001271.pub3  
37  
38 29 18. Laux G, Kaufmann-Kolle P, Bauer E, Goetz K, Stock C, Szecsenyi J.  
39 30 [Evaluation of family doctor centred medical care based on AOK routine  
40 31 data in Baden-Württemberg]. *Z Evid Fortbild Qual Gesundheitswes*.  
41 32 2013;107: 372–378. doi:10.1016/j.zefq.2013.07.001  
42  
43 33 19. Fricke U, Hein L, Schwabe U. *Neue Arzneimittel 2016*. In: Schwabe U,  
44 34 Paffrath D, Ludwig W-D, Klauber J, editors. *Arzneiverordnungs-Report*  
45 35 2017. Berlin, Heidelberg: Springer Berlin Heidelberg; 2017. pp. 55–135.  
46 36 doi:10.1007/978-3-662-54630-7\_3  
47  
48 37 20. Sundararajan V, Henderson T, Perry C, Muggivan A, Quan H, Ghali WA.  
49 38 New ICD-10 version of the Charlson comorbidity index predicted in-  
50 39 hospital mortality. *J Clin Epidemiol*. 2004;57: 1288–1294.  
51 40 doi:10.1016/j.jclinepi.2004.03.012  
52  
53  
54  
55  
56  
57  
58  
59  
60

- 1  
2  
3 1 21. Freund T, Mahler C, Erler A, Gensichen J, Ose D, Szecsenyi J, et al.  
4 2 Identification of patients likely to benefit from care management programs.  
5 3 Am J Manag Care. 2011;17: 345–352.  
6  
7  
8 4 22. Siebenhofer A, Ulrich L-R, Mergenthal K, Berghold A, Pregartner G,  
9 5 Kemperdick B, et al. Primary care management for patients receiving  
10 6 long-term antithrombotic treatment: A cluster-randomized controlled trial.  
11 7 PLoS ONE. 2019;14: e0209366. doi:10.1371/journal.pone.0209366  
12  
13 8 23. Takeda A, Martin N, Taylor RS, Taylor SJ. Disease management  
14 9 interventions for heart failure. Cochrane Database Syst Rev. 2019;1:  
15 10 CD002752. doi:10.1002/14651858.CD002752.pub4  
16  
17 11 24. Lenferink A, Brusse-Keizer M, van der Valk PD, Frith PA, Zwerink M,  
18 12 Monninkhof EM, et al. Self-management interventions including action  
19 13 plans for exacerbations versus usual care in patients with chronic  
20 14 obstructive pulmonary disease. Cochrane Database Syst Rev. 2017;8:  
21 15 CD011682. doi:10.1002/14651858.CD011682.pub2  
22  
23 16 25. Smith SM, Soubhi H, Fortin M, Hudon C, O'Dowd T. Interventions for  
24 17 improving outcomes in patients with multimorbidity in primary care and  
25 18 community settings. Cochrane Database Syst Rev. 2012; CD006560.  
26 19 doi:10.1002/14651858.CD006560.pub2  
27  
28 20 26. Peytremann-Bridevaux I, Arditi C, Gex G, Bridevaux P-O, Burnand B.  
29 21 Chronic disease management programmes for adults with asthma.  
30 22 Cochrane Database Syst Rev. 2015; CD007988.  
31 23 doi:10.1002/14651858.CD007988.pub2  
32  
33 24 27. Koehler F, Koehler K, Deckwart O, Prescher S, Wegscheider K, Kirwan  
34 25 B-A, et al. Efficacy of telemedical interventional management in patients  
35 26 with heart failure (TIM-HF2): a randomised, controlled, parallel-group,  
36 27 unmasked trial. Lancet. 2018;392: 1047–1057. doi:10.1016/S0140-  
37 28 6736(18)31880-4  
38  
39 29 28. Hesselink G, Schoonhoven L, Barach P, Spijker A, Gademan P, Kalkman  
40 30 C, et al. Improving patient handovers from hospital to primary care: a  
41 31 systematic review. Ann Intern Med. 2012;157: 417–428.  
42 32 doi:10.7326/0003-4819-157-6-201209180-00006  
43  
44 33 29. Braet A, Weltens C, Sermeus W. Effectiveness of discharge interventions  
45 34 from hospital to home on hospital readmissions: a systematic review. JBI  
46 35 Database System Rev Implement Rep. 2016;14: 106–173.  
47 36 doi:10.11124/jbisrir-2016-2381  
48  
49 37  
50  
51 38  
52  
53  
54  
55  
56  
57  
58  
59  
60



**STROBE 2007 (v4) Statement—Checklist of items that should be included in reports of *cross-sectional studies***

| Section/Topic                | Item # | Recommendation                                                                                                                                                                       | Reported on page # |
|------------------------------|--------|--------------------------------------------------------------------------------------------------------------------------------------------------------------------------------------|--------------------|
| <b>Title and abstract</b>    | 1      | (a) Indicate the study's design with a commonly used term in the title or the abstract                                                                                               | 1                  |
|                              |        | (b) Provide in the abstract an informative and balanced summary of what was done and what was found                                                                                  | 2                  |
| <b>Introduction</b>          |        |                                                                                                                                                                                      |                    |
| Background/rationale         | 2      | Explain the scientific background and rationale for the investigation being reported                                                                                                 | 6                  |
| Objectives                   | 3      | State specific objectives, including any prespecified hypotheses                                                                                                                     | 6                  |
| <b>Methods</b>               |        |                                                                                                                                                                                      |                    |
| Study design                 | 4      | Present key elements of study design early in the paper                                                                                                                              | 8                  |
| Setting                      | 5      | Describe the setting, locations, and relevant dates, including periods of recruitment, exposure, follow-up, and data collection                                                      | 9                  |
| Participants                 | 6      | (a) Give the eligibility criteria, and the sources and methods of selection of participants                                                                                          | 8                  |
| Variables                    | 7      | Clearly define all outcomes, exposures, predictors, potential confounders, and effect modifiers. Give diagnostic criteria, if applicable                                             | 9                  |
| Data sources/<br>measurement | 8*     | For each variable of interest, give sources of data and details of methods of assessment (measurement). Describe comparability of assessment methods if there is more than one group | 9                  |
| Bias                         | 9      | Describe any efforts to address potential sources of bias                                                                                                                            | 10                 |
| Study size                   | 10     | Explain how the study size was arrived at                                                                                                                                            | 10                 |
| Quantitative variables       | 11     | Explain how quantitative variables were handled in the analyses. If applicable, describe which groupings were chosen and why                                                         | 10                 |
| Statistical methods          | 12     | (a) Describe all statistical methods, including those used to control for confounding                                                                                                | 10                 |
|                              |        | (b) Describe any methods used to examine subgroups and interactions                                                                                                                  | 10                 |
|                              |        | (c) Explain how missing data were addressed                                                                                                                                          | n/a                |
|                              |        | (d) If applicable, describe analytical methods taking account of sampling strategy                                                                                                   | n/a                |
|                              |        | (e) Describe any sensitivity analyses                                                                                                                                                | 10                 |
| <b>Results</b>               |        |                                                                                                                                                                                      |                    |



|                          |     |                                                                                                                                                                                                              |     |
|--------------------------|-----|--------------------------------------------------------------------------------------------------------------------------------------------------------------------------------------------------------------|-----|
| Participants             | 13* | (a) Report numbers of individuals at each stage of study—eg numbers potentially eligible, examined for eligibility, confirmed eligible, included in the study, completing follow-up, and analysed            | 11  |
|                          |     | (b) Give reasons for non-participation at each stage                                                                                                                                                         | n/a |
|                          |     | (c) Consider use of a flow diagram                                                                                                                                                                           | n/a |
| Descriptive data         | 14* | (a) Give characteristics of study participants (eg demographic, clinical, social) and information on exposures and potential confounders                                                                     | 11  |
|                          |     | (b) Indicate number of participants with missing data for each variable of interest                                                                                                                          | n/a |
| Outcome data             | 15* | Report numbers of outcome events or summary measures                                                                                                                                                         | 12  |
| Main results             | 16  | (a) Give unadjusted estimates and, if applicable, confounder-adjusted estimates and their precision (eg, 95% confidence interval). Make clear which confounders were adjusted for and why they were included | 12  |
|                          |     | (b) Report category boundaries when continuous variables were categorized                                                                                                                                    | n/a |
|                          |     | (c) If relevant, consider translating estimates of relative risk into absolute risk for a meaningful time period                                                                                             | n/a |
| Other analyses           | 17  | Report other analyses done—eg analyses of subgroups and interactions, and sensitivity analyses                                                                                                               | 12  |
| <b>Discussion</b>        |     |                                                                                                                                                                                                              |     |
| Key results              | 18  | Summarise key results with reference to study objectives                                                                                                                                                     | 13  |
| Limitations              | 19  | Discuss limitations of the study, taking into account sources of potential bias or imprecision. Discuss both direction and magnitude of any potential bias                                                   | 15  |
| Interpretation           | 20  | Give a cautious overall interpretation of results considering objectives, limitations, multiplicity of analyses, results from similar studies, and other relevant evidence                                   | 16  |
| Generalisability         | 21  | Discuss the generalisability (external validity) of the study results                                                                                                                                        | 15  |
| <b>Other information</b> |     |                                                                                                                                                                                                              |     |
| Funding                  | 22  | Give the source of funding and the role of the funders for the present study and, if applicable, for the original study on which the present article is based                                                | 17  |

\*Give information separately for cases and controls in case-control studies and, if applicable, for exposed and unexposed groups in cohort and cross-sectional studies.

**Note:** An Explanation and Elaboration article discusses each checklist item and gives methodological background and published examples of transparent reporting. The STROBE checklist is best used in conjunction with this article (freely available on the Web sites of PLoS Medicine at <http://www.plosmedicine.org/>, Annals of Internal Medicine at <http://www.annals.org/>, and Epidemiology at <http://www.epidem.com/>). Information on the STROBE Initiative is available at [www.strobe-statement.org](http://www.strobe-statement.org).
